# Supplementary material for: Asymmetric synthesis of spirooxindole–pyranoindole products via Friedel–Crafts alkylation/cyclization of the indole carbocyclic ring
Source: Royal Society of Chemistry journal article supplement (doi:10.1039/d0nj00074d), 2020-01-01
Supplement: d0nj00074d1.pdf [file d0nj00074d1.pdf]

## Supporting information

### Asymmetric synthesis of spirooxindole-pyranoindoles via Friedel-Crafts alkylation/cyclization of the indole carbocyclic ring

Yuan Gao, Xiaonan Wang, Zhonglin Wei, Jungang Cao, Dapeng Liang, Yingjie Lin, and Haifeng Duan

Department of Organic Chemistry, College of Chemistry, Jilin University, 2699 Qianjin Street, Changchun 130012, China

E-mail: linyj@jlu.edu.cn; duanhf@jlu.edu.cn; Tel: 0431-85168398

#### Table of Contents

|                                                                                                                                                                     |                |
|---------------------------------------------------------------------------------------------------------------------------------------------------------------------|----------------|
| <b>1. General information</b>                                                                                                                                       | <b>S2</b>      |
| <b>2. Starting materials</b>                                                                                                                                        | <b>S2</b>      |
| <b>3. Preparation and characterization of catalyst 1j</b>                                                                                                           | <b>S2-S3</b>   |
| <b>4. General procedure for the Friedel-Crafts alkylation/cyclization of 4-hydroxyindole with isatylidene malononitriles and characterization of products 4a-4o</b> | <b>S3-S7</b>   |
| <b>5. NMR spectra of catalyst 1j and addition products 4a-4o</b>                                                                                                    | <b>S8-S24</b>  |
| <b>6. HPLC traces of compounds 4a-4o</b>                                                                                                                            | <b>S25-S45</b> |
| <b>7. X-ray Crystallographic Data of compound 4e</b>                                                                                                                | <b>S46</b>     |
| <b>8. References</b>                                                                                                                                                | <b>S47</b>     |

## 1. General information

Unless otherwise stated, all reagents were purchased from commercial suppliers and used without purification. All solvents were obtained from commercial sources and were purified according to standard procedures. TLC was carried out on silica gel plates (HSGF 254), which were visualized with UV light and/or staining with phosphomolybdic acids solution. Purification of reaction products was carried out by column chromatography using silica gel (200-300 mesh).  $^1\text{H}$ ,  $^{13}\text{C}$  NMR, and  $^{19}\text{F}$  NMR spectra were recorded on a Varian Mercury-300BB (300 MHz), a Bruker NMR Spectrometer (400 MHz), or a Bruker NMR Spectrometer (500 MHz). All chemical shifts ( $\delta$ ) were given in ppm. Chemical shifts are relative to the resonance of the deuterated solvent as the internal standard ( $\text{CDCl}_3$ ,  $\delta 77.26$  ppm for proton NMR,  $\delta 77.16$  ppm for carbon NMR;  $\text{DMSO-}d_6$ ,  $\delta 2.50$  ppm for proton NMR,  $\delta 39.52$  ppm for carbon NMR). Data are presented as follows: chemical shift, integration, multiplicity (br = broad, s = singlet, d = double, t = triplet, q = quartet, m = multiplet), and coupling constant in hertz. Mass spectra were recorded on a Bruker Agilent 1290 MicroTOF-Q II instrument. Melting points were measured on a melting points apparatus and were uncorrected. The enantioselectivity value determination was carried out using chiral HPLC (Waters) instrumentation with a Chiracel AD-H column and IA-3 column. Optical rotations were measured on a Shanghai ShenGuang SGW-2 polarimeter at  $\lambda = 589$  nm. Optical rotations are reported as follows:  $[\alpha]_D^{25}$  (c = g/100mL, solvent).

## 2. Starting materials.

Isatylidene malononitriles were prepared according to literature procedures.<sup>1,2</sup>

## 3. Preparation and characterization of catalyst **1j**

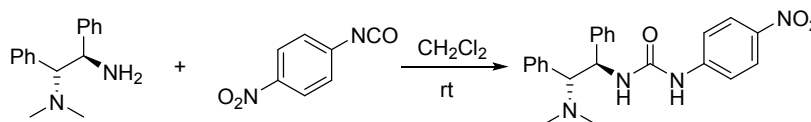

1-isocyanato-4-nitrobenzene (164.1 mg, 1.0 mmol) was added to a solution of (1R, 2R)-N,N-dimethyl-1,2-diphenylethane-1,2-diamine (240.4mg, 1.0 mmol) in dichloromethane (4mL) at room temperature. The resulting mixture was stirred at room temperature for 12 h. Then the solvent was removed in vacuo via evaporation. The crude product was purified by chromatography ( $\text{CH}_2\text{Cl}_2/\text{MeOH} = 40:1$ ) to afford the desired organocatalyst (287.2mg, 71% yield) as a yellow solid.

1-((1R,2R)-2-(dimethylamino)-1,2-diphenylethyl)-3-(4-nitrophenyl)urea (**1j**)

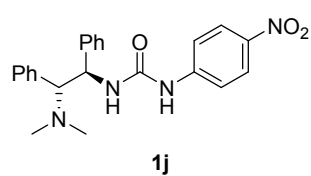

**m. p.** = 127-129°C,  $[\alpha]_D^{25} = +48.4$  (c = 0.1,  $\text{CHCl}_3$ ).  $^1\text{H}$  NMR (400 MHz,  $\text{Chloroform-}d$ )  $\delta$  8.09 (d,  $J = 8.8$  Hz, 2H), 7.66 (s, 1H), 7.42 (d,  $J = 8.7$  Hz, 2H), 7.33 – 6.83 (m, 11H), 5.05 (d,  $J = 10.7$  Hz, 1H), 3.67 (d,  $J = 10.8$  Hz, 1H), 2.17 (s, 6H).  $^{13}\text{C}$  NMR (101 MHz,  $\text{CDCl}_3$ )  $\delta$  154.9, 145.7, 142.0, 140.5, 131.8, 129.8, 128.4, 128.0, 127.9, 127.5, 127.4, 125.1, 117.7, 74.0, 55.5, 40.7. **HRMS** (ESI) calculated for  $\text{C}_{23}\text{H}_{24}\text{N}_4\text{O}_3$  [M + H]<sup>+</sup>: 405.1921, found 405.1925.

## Mass Spectrum SmartFormula Report

|                      |                                                  |                   |                     |
|----------------------|--------------------------------------------------|-------------------|---------------------|
| <b>Analysis Info</b> |                                                  | Acquisition Date  | 2019/8/25 22:23:18  |
| Analysis Name        | F:\ÉÖÉ°É2\Ç>úßÁáí°ÖÈ\L08-188-8_P1-D-7_01_14747.d | Operator          | zlwei               |
| Method               | lc-ms-hr-low.m                                   | Instrument / Ser# | micrOTOF-Q II 10351 |
| Sample Name          | L08-188-8                                        |                   |                     |
| Comment              |                                                  |                   |                     |

|                              |          |                       |           |                  |           |
|------------------------------|----------|-----------------------|-----------|------------------|-----------|
| <b>Acquisition Parameter</b> |          |                       |           |                  |           |
| Source Type                  | ESI      | Ion Polarity          | Positive  | Set Nebulizer    | 0.6 Bar   |
| Focus                        | Active   | Set Capillary         | 4500 V    | Set Dry Heater   | 200 °C    |
| Scan Begin                   | 50 m/z   | Set End Plate Offset  | -500 V    | Set Dry Gas      | 8.0 l/min |
| Scan End                     | 1200 m/z | Set Collision Cell RF | 100.0 Vpp | Set Divert Valve | Waste     |

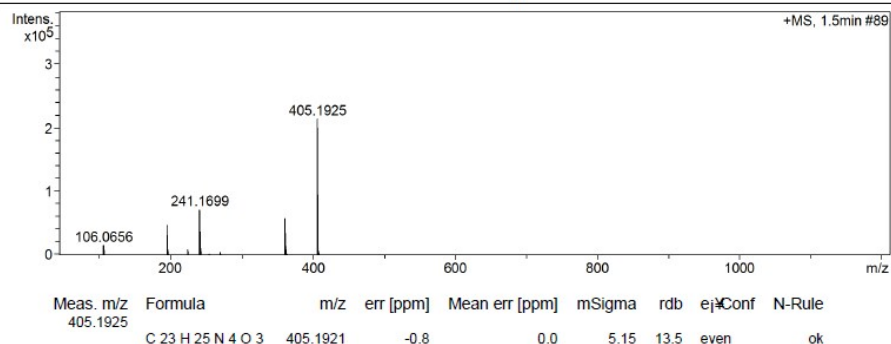

### 4. General procedure for the Friedel-Crafts alkylation/cyclization of 4-hydroxyindole to isatylidene malononitriles and characterization of products 4a-4n.

4-hydroxyindole **3a** (0.15 mmol) was added to a solution of isatylidene malononitriles **2** (0.1 mmol) and catalyst **1j** (0.010 mmol, 10 mol%) in *m*-xylene (1 mL). And the resulting mixture was stirred at room temperature until completion (TLC). Then the solvent was removed in vacuo via evaporation. The crude product was purified by chromatography (PE/EA = 1:1).

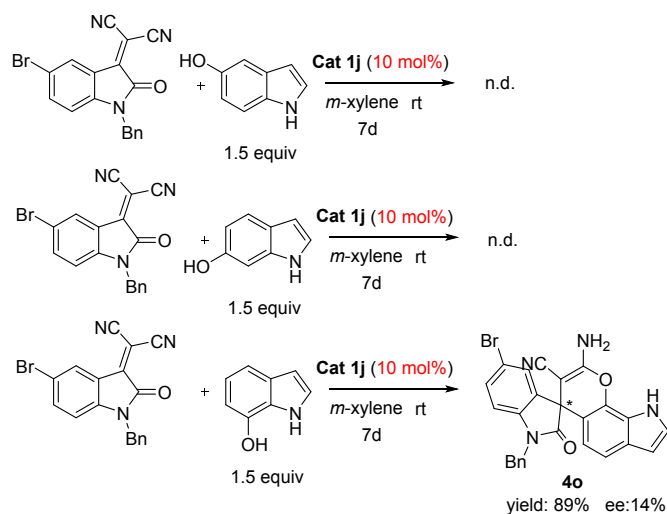

#### (R)-2'-amino-1-benzyl-2-oxo-7'H-spiro[indoline-3,4'-pyrano[2,3-e]indole]-3'-carbonitrile (**4a**)

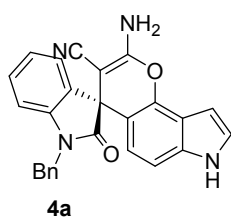

White solid, 41.0 mg, 98% yield, **m. p.** =256-258°C,  $[\alpha]_D^{25} = +16.4$  ( $c = 0.1$ , MeOH). The ee value was 76% (Chiralpak AD-H, hexane/*i*-PrOH =70:30, 220 nm, 1 mL/min,  $t_{\text{major}} = 27.86$ min,  $t_{\text{minor}} = 11.35$  min). <sup>1</sup>H NMR (400 MHz, DMSO)  $\delta$  11.40 (s, 1H), 7.47 – 7.22 (m, 9H), 7.15 – 6.94 (m, 4H), 6.53 (s, 1H), 6.09 (d,  $J = 8.5$  Hz, 1H), 4.97 (q,  $J = 15.9$  Hz, 2H). <sup>13</sup>C NMR (101 MHz, DMSO)  $\delta$  178.5, 162.0, 142.8, 142.0, 137.2, 136.6,

135.2, 129.3, 129.1, 127.9, 127.6, 126.6, 125.2, 123.8, 119.4, 119.1, 117.1, 109.9, 109.4, 109.2,

98.0, 54.8, 50.6, 43.5. **HRMS** (ESI) calculated for  $C_{26}H_{18}N_4O_2[M + H]^+$ : 419.1512, found 419.1503.

(R)-2'-amino-1-benzyl-5-chloro-2-oxo-7'H-spiro[indoline-3,4'-pyrano[2,3-e]indole]-3'-carbonitrile (**4b**)

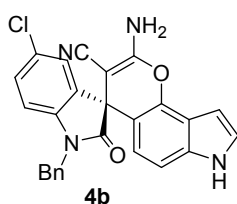

White solid, 44.4 mg, 98% yield, **m. p.** = 284-286°C,  $[\alpha]_D^{25} = +18.0$  ( $c = 0.1$ , MeOH). The ee value was 82% (Chiralpak AD-H, hexane/*i*-PrOH = 70:30, 220 nm, 1 mL/min,  $t_{major} = 22.72$ min,  $t_{minor} = 9.72$  min). **<sup>1</sup>H NMR** (400 MHz, DMSO- $d_6$ )  $\delta$  11.43 (s, 1H), 7.46 – 7.41 (m, 1H), 7.40 – 7.26 (m, 8H), 7.20 (d,  $J = 2.0$  Hz, 1H), 7.08 (d,  $J = 8.5$  Hz, 1H), 7.02 (d,  $J = 8.4$  Hz, 1H), 6.53 (s, 1H), 6.11 (d,  $J = 8.5$  Hz, 1H), 5.08 – 4.88 (m, 2H). **<sup>13</sup>C NMR** (101 MHz, DMSO)  $\delta$  178.3, 162.0, 142.0, 141.7, 137.3, 137.2, 136.3, 129.3, 129.1, 128.0, 128.0, 127.6, 126.7, 125.4, 119.4, 119.0, 117.1, 111.5, 109.6, 108.4, 98.1, 54.1, 50.9, 43.6. **HRMS** (ESI) calculated for  $C_{26}H_{17}ClN_4O_2[M + H]^+$ : 453.1118, found 453.1113.

(R)-2'-amino-1-benzyl-5-bromo-2-oxo-7'H-spiro[indoline-3,4'-pyrano[2,3-e]indole]-3'-carbonitrile (**4c**)

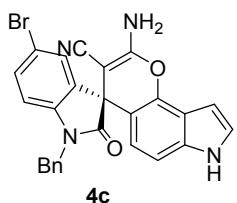

White solid, 48.7mg, 98% yield, **m. p.** = 277-279°C,  $[\alpha]_D^{25} = +15.2$  ( $c = 0.1$ , MeOH). The ee value was 84% (Chiralpak AD-H, hexane/*i*-PrOH = 70:30, 220 nm, 1 mL/min,  $t_{major} = 24.04$ min,  $t_{minor} = 10.19$  min). **<sup>1</sup>H NMR** (400 MHz, DMSO- $d_6$ )  $\delta$  11.43 (s, 1H), 7.52 – 7.25 (m, 10H), 7.08 (d,  $J = 8.4$  Hz, 1H), 6.97 (d,  $J = 8.3$  Hz, 1H), 6.53 (s, 1H), 6.12 (d,  $J = 8.4$  Hz, 1H), 5.10 – 4.85 (m, 2H). **<sup>13</sup>C NMR** (101 MHz, DMSO)  $\delta$  178.1, 162.0, 142.1, 142.0, 137.6, 137.3, 136.2, 132.2, 129.1, 128.0, 128.0, 127.6, 126.7, 119.4, 119.0, 117.1, 115.7, 112.1, 109.6, 108.4, 98.1, 54.1, 50.9, 43.6. **HRMS**(ESI) calculated for  $C_{26}H_{17}BrN_4O_2[M + H]^+$ : 497.0604, found 497.0608.

(R)-2'-amino-1-benzyl-5-iodo-2-oxo-7'H-spiro[indoline-3,4'-pyrano[2,3-e]indole]-3'-carbonitrile (**4d**)

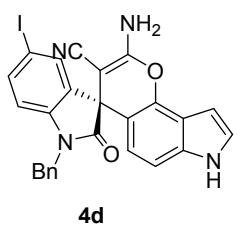

White solid, 49.5 mg, 91% yield, **m. p.** = 272-274°C,  $[\alpha]_D^{25} = +13.2$  ( $c = 0.1$ , MeOH). The ee value was 83% (Chiralpak AD-H, hexane/*i*-PrOH = 70:30, 220 nm, 1 mL/min,  $t_{major} = 27.19$ min,  $t_{minor} = 11.03$  min). **<sup>1</sup>H NMR** (400 MHz, DMSO- $d_6$ )  $\delta$  11.43 (s, 1H), 7.63 (dd,  $J = 8.2, 1.7$  Hz, 1H), 7.46 – 7.26 (m, 9H), 7.08 (d,  $J = 8.5$  Hz, 1H), 6.85 (d,  $J = 8.3$  Hz, 1H), 6.53 (s, 1H), 6.11 (d,  $J = 8.5$  Hz, 1H), 5.08 – 4.83 (m, 2H). **<sup>13</sup>C NMR** (101 MHz, DMSO)  $\delta$  177.9, 162.0, 142.6, 141.9, 138.0, 137.8, 137.3, 136.2, 133.4, 129.1, 128.0, 127.6, 126.7, 119.4, 119.0, 117.1, 112.5, 109.6, 108.4, 98.1, 87.1, 54.2, 50.6, 43.6. **HRMS** (ESI) calculated for  $C_{26}H_{17}IN_4O_2[M + H]^+$ : 545.0468, found 545.0469.

(R)-2'-amino-1-benzyl-5-methoxy-2-oxo-7'H-spiro[indoline-3,4'-pyrano[2,3-e]indole]-3'-carbonitrile (**4e**)

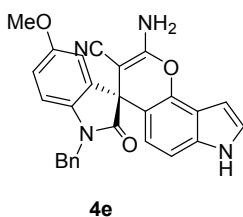

White solid, 42.1 mg, 94% yield, **m. p.** = 287-289°C,  $[\alpha]_D^{25} = +15.6$  ( $c = 0.1$ , MeOH). The ee value was 85% (Chiralpak AD-H, hexane/*i*-PrOH = 70:30, 220 nm, 1 mL/min,  $t_{major} = 42.64$ min,  $t_{minor} = 14.34$  min). **<sup>1</sup>H NMR** (400 MHz, DMSO- $d_6$ )  $\delta$  11.40 (s, 1H), 7.47 – 7.24 (m, 8H), 7.07 (d,  $J = 8.4$  Hz,

1H), 6.93 – 6.80 (m, 2H), 6.76 – 6.66 (m, 1H), 6.53 (s, 1H), 6.11 (d,  $J = 8.4$  Hz, 1H), 4.93 (q,  $J = 15.8$  Hz, 2H), 3.64 (s, 3H).  $^{13}\text{C}$  NMR (101 MHz, DMSO)  $\delta$  178.3, 162.0, 156.6, 142.0, 137.2, 136.7, 136.5, 136.1, 129.0, 127.9, 127.6, 126.6, 119.5, 119.2, 117.1, 114.0, 111.9, 110.5, 109.4, 109.2, 98.1, 55.9, 54.8, 51.1, 43.6. HRMS(ESI) calculated for  $\text{C}_{27}\text{H}_{20}\text{N}_4\text{O}_3[\text{M} + \text{H}]^+$ : 449.1621, found 449.1608.

(R)-2'-amino-1-benzyl-5-methyl-2-oxo-7'H-spiro[indoline-3,4'-pyrano[2,3-e]indole]-3'-carbonitrile (**4f**)

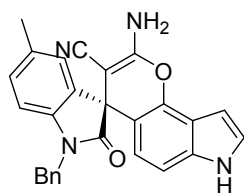

**4f**

White solid, 38.9 mg, 90% yield, **m. p.** =240-242°C,  $[\alpha]_{\text{D}}^{25} = +14.4$  ( $c = 0.1$ , MeOH). The ee value was 68% (Chiralpak AD-H, hexane/*i*-PrOH =70:30, 220 nm, 1 mL/min,  $t_{\text{major}} = 24.66$ min,  $t_{\text{minor}} = 10.01$  min).  $^1\text{H}$  NMR (400 MHz, DMSO- $d_6$ )  $\delta$  11.39 (s, 1H), 7.44 – 7.40 (m, 1H), 7.32 (dd,  $J = 28.9$ , 13.4, 7.0 Hz, 7H), 7.05 (d,  $J = 8.3$  Hz, 2H), 6.93 (s, 1H), 6.86 (d,  $J = 8.0$  Hz, 1H), 6.52 (s, 1H), 6.10 (d,  $J = 8.5$  Hz, 1H), 5.03 – 4.85 (m, 2H), 2.20 (s, 3H).  $^{13}\text{C}$  NMR (101 MHz, DMSO)  $\delta$  178.5, 161.9, 141.9, 140.4, 137.2, 136.7, 135.4, 132.9, 129.5, 129.0, 127.9, 127.6, 126.6, 125.7, 119.5, 119.2, 117.1, 109.7, 109.4, 109.3, 98.0, 54.9, 50.7, 43.5, 21.0. HRMS(ESI) calculated for  $\text{C}_{27}\text{H}_{20}\text{N}_4\text{O}_2[\text{M} + \text{H}]^+$ : 433.1666, found 433.1659.

(R)-2'-amino-1-benzyl-6-fluoro-2-oxo-7'H-spiro[indoline-3,4'-pyrano[2,3-e]indole]-3'-carbonitrile (**4g**)

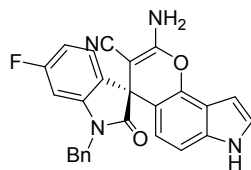

**4g**

White solid, 40.1 mg, 92% yield, **m. p.** = 258-260°C,  $[\alpha]_{\text{D}}^{25} = +14.0$  ( $c = 0.1$ , MeOH). The ee value was 73% (Chiralpak AD-H, hexane/*i*-PrOH =70:30, 220 nm, 1 mL/min,  $t_{\text{major}} = 20.12$ min,  $t_{\text{minor}} = 10.92$  min).  $^1\text{H}$  NMR (400 MHz, DMSO- $d_6$ )  $\delta$  11.40 (s, 1H), 7.36 (dd,  $J = 28.0$ , 16.4 Hz, 8H), 7.19 – 7.12 (m, 1H), 7.06 (d,  $J = 8.4$  Hz, 1H), 6.97 (d,  $J = 8.9$  Hz, 1H), 6.85 (t,  $J = 8.4$  Hz, 1H), 6.52 (s, 1H), 6.09 (d,  $J = 8.4$  Hz, 1H), 4.97 (q,  $J = 15.8$  Hz, 2H).  $^{13}\text{C}$  NMR (101 MHz, DMSO)  $\delta$  178.9, 162.0, 144.6 (d,  $J = 12.3$  Hz), 142.0, 137.2, 136.3, 130.9, 130.9, 129.1, 128.0, 127.7, 126.8 (d,  $J = 10.1$  Hz), 126.7, 119.0, 118.2 (d,  $J = 224.9$  Hz), 110.0, 109.8, 109.5, 108.9, 98.5 (d,  $J = 28.5$  Hz), 98.1, 54.5, 50.3, 43.6.  $^{19}\text{F}$  NMR (377 MHz, DMSO)  $\delta$  -111.61. HRMS (ESI) calculated for  $\text{C}_{26}\text{H}_{17}\text{FN}_4\text{O}_2[\text{M} + \text{H}]^+$ : 437.1411, found 437.1408.

(R)-2'-amino-1-benzyl-6-chloro-2-oxo-7'H-spiro[indoline-3,4'-pyrano[2,3-e]indole]-3'-carbonitrile(**4h**)

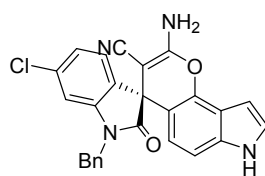

**4h**

White solid, 44.3 mg, 98% yield, **m. p.** =267-269°C,  $[\alpha]_{\text{D}}^{25} = +18.4$  ( $c = 0.1$ , MeOH). The ee value was 77% (Chiralpak AD-H, hexane/*i*-PrOH =70:30, 220 nm, 1 mL/min,  $t_{\text{major}} = 19.81$ min,  $t_{\text{minor}} = 8.73$  min).  $^1\text{H}$  NMR (400 MHz, DMSO)  $\delta$  11.42, 7.44, 7.43, 7.42, 7.39, 7.39, 7.37, 7.35, 7.33, 7.32, 7.31, 7.31, 7.30, 7.28, 7.16, 7.14, 7.10, 7.10, 7.08, 7.08, 7.06, 6.52, 6.52, 6.51, 6.12, 6.10, 5.05, 5.01, 4.97, 4.93.  $^{13}\text{C}$  NMR (101 MHz, DMSO)  $\delta$  177.4, 160.9, 143.2, 140.8, 136.1, 135.1, 132.8, 132.5, 128.0, 126.9, 126.5, 125.6, 125.6, 122.4, 118.1, 117.8, 115.9, 109.1, 108.4, 107.4, 96.9, 53.1, 49.2, 42.4. HRMS (ESI) calculated for  $\text{C}_{26}\text{H}_{17}\text{ClN}_4\text{O}_2[\text{M} + \text{H}]^+$ : 453.1114, found 453.1113.

(R)-2'-amino-1-benzyl-6-bromo-2-oxo-7'H-spiro[indoline-3,4'-pyrano[2,3-e]indole]-3'-carbonitrile (**4i**)

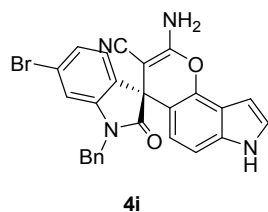

White solid, 44.6 mg, 90% yield, **m. p.** =272-274°C,  $[\alpha]_D^{25} = +11.2$  ( $c = 0.1$ , MeOH). The ee value was 78% (Chiralpak AD-H, hexane/*i*-PrOH =70:30, 220 nm, 1 mL/min,  $t_{\text{major}} = 20.72$ min,  $t_{\text{minor}} = 8.58$  min). **<sup>1</sup>H NMR** (400 MHz, DMSO-*d*<sub>6</sub>)  $\delta$  11.42 (s, 1H), 7.49 – 7.19 (m, 10H), 7.15 – 7.03 (m, 2H), 6.53 (s, 1H), 6.12 (d,  $J = 8.4$  Hz, 1H), 5.00 (q,  $J = 15.9$  Hz, 2H). **<sup>13</sup>C NMR** (101 MHz, DMSO)  $\delta$  178.5, 162.1, 144.5, 142.0, 137.3, 136.3, 134.4, 129.1, 128.0, 127.6, 127.2, 126.7, 126.5, 122.1, 119.3, 119.0, 117.1, 113.0, 109.6, 108.5, 98.1, 54.2, 50.5, 43.5. **HRMS** (ESI) calculated for C<sub>26</sub>H<sub>17</sub>BrN<sub>4</sub>O<sub>2</sub>[M + H]<sup>+</sup>: 497.0621, found 497.0608.

(R)-2'-amino-1-benzyl-7-chloro-2-oxo-7'H-spiro[indoline-3,4'-pyrano[2,3-e]indole]-3'-carbonitrile (**4j**)

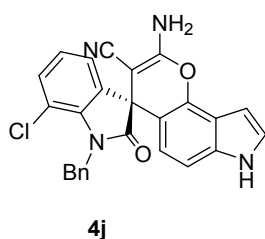

White solid, 40.6 mg, 90% yield, **m. p.** =266-268°C,  $[\alpha]_D^{25} = +13.2$  ( $c = 0.1$ , MeOH). The ee value was 75% (Chiralpak AD-H, hexane/*i*-PrOH =70:30, 220 nm, 1 mL/min,  $t_{\text{major}} = 24.50$ min,  $t_{\text{minor}} = 10.71$  min). **<sup>1</sup>H NMR** (400 MHz, DMSO-*d*<sub>6</sub>)  $\delta$  11.43 (s, 1H), 7.46 – 7.23 (m, 9H), 7.17 – 7.06 (m, 3H), 6.56 – 6.48 (m, 1H), 6.23 (d,  $J = 8.5$  Hz, 1H), 5.30 (s, 2H). **<sup>13</sup>C NMR** (101 MHz, DMSO)  $\delta$  179.3, 162.0, 141.9, 138.8, 138.3, 137.9, 137.3, 131.6, 129.0, 127.5, 126.8, 126.5, 125.3, 124.7, 119.4, 119.1, 117.1, 114.8, 109.7, 108.7, 98.1, 54.5, 50.6, 45.1. **HRMS** (ESI) calculated for C<sub>26</sub>H<sub>17</sub>ClN<sub>4</sub>O<sub>2</sub>[M + H]<sup>+</sup>: 453.1119, found 453.1113.

(R)-2'-amino-1-benzyl-7-bromo-2-oxo-7'H-spiro[indoline-3,4'-pyrano[2,3-e]indole]-3'-carbonitrile (**4k**)

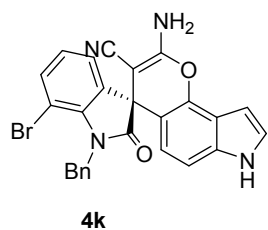

White solid, 48.5 mg, 98% yield, **m. p.** =275-277°C,  $[\alpha]_D^{25} = +33.2$  ( $c = 0.1$ , MeOH). The ee value was 78% (Chiralpak AD-H, hexane/*i*-PrOH =70:30, 220 nm, 1 mL/min,  $t_{\text{major}} = 25.35$ min,  $t_{\text{minor}} = 11.32$  min). **<sup>1</sup>H NMR** (400 MHz, )  $\delta$  11.47 (s, 1H), 7.56 – 7.28 (m, 9H), 7.23 (d,  $J = 7.3$  Hz, 1H), 7.16 (d,  $J = 8.5$  Hz, 1H), 7.08 (t,  $J = 7.7$  Hz, 1H), 6.58 (s, 1H), 6.28 (d,  $J = 8.5$  Hz, 1H), 5.48 – 5.31 (m, 2H). **<sup>13</sup>C NMR** (101 MHz, DMSO)  $\delta$  179.4, 162.0, 141.9, 140.3, 138.7, 137.8, 137.3, 135.0, 128.9, 127.4, 126.8, 126.5, 125.7, 125.3, 119.4, 119.1, 117.1, 109.6, 108.7, 102.3, 98.1, 54.6, 50.5, 44.8. **HRMS** (ESI) calculated for C<sub>26</sub>H<sub>17</sub>BrN<sub>4</sub>O<sub>2</sub>[M + H]<sup>+</sup>: 497.0606, found 497.0608.

(R)-2'-amino-1-benzyl-7-methyl-2-oxo-7'H-spiro[indoline-3,4'-pyrano[2,3-e]indole]-3'-carbonitrile (**4l**)

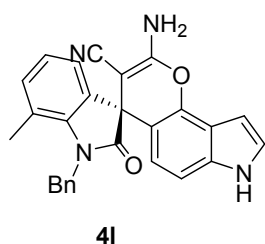

White solid, 41.8 mg, 97% yield, **m. p.** =272-274°C,  $[\alpha]_D^{25} = +12.0$  ( $c = 0.1$ , MeOH). The ee value was 47% (Chiralpak AD-H, hexane/*i*-PrOH =70:30, 220 nm, 1 mL/min,  $t_{\text{major}} = 42.42$ min,  $t_{\text{minor}} = 10.81$  min). **<sup>1</sup>H NMR** (400 MHz, DMSO-*d*<sub>6</sub>)  $\delta$  11.39 (s, 1H), 7.47 – 7.17 (m, 8H), 7.13 – 6.90 (m, 4H), 6.52 (s, 1H), 6.23 (d,  $J = 8.5$  Hz, 1H), 5.31 – 5.06 (m, 2H), 2.29 (s, 3H). **<sup>13</sup>C NMR** (101 MHz, DMSO)  $\delta$  179.6, 162.0, 142.0,

140.9, 138.3, 137.2, 136.0, 133.0, 129.2, 127.6, 126.6, 126.1, 123.9, 123.5, 120.1, 119.7, 119.3, 117.1, 109.6, 109.4, 98.1, 55.3, 50.1, 45.1, 18.6. **HRMS** (ESI) calculated for  $C_{27}H_{20}N_4O_2[M + H]^+$ : 433.1653, found 433.1659.

(R)-2'-amino-5-methoxy-1-methyl-2-oxo-7'H-spiro[indoline-3,4'-pyrano[2,3-e]indole]-3'-carbonitrile (**4m**)

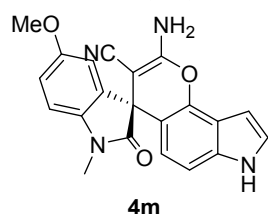

White solid, 33.8 mg, 91% yield, **m. p.** = 248-250°C,  $[\alpha]_D^{25} = +14.4$  ( $c = 0.1$ , MeOH). The ee value was 63% (Chiralpak AD-H, hexane/*i*-PrOH = 70:30, 220 nm, 1 mL/min,  $t_{major} = 14.92$  min,  $t_{minor} = 10.46$  min). **<sup>1</sup>H NMR** (400 MHz, DMSO-*d*<sub>6</sub>)  $\delta$  11.37 (s, 1H), 7.41 (s, 1H), 7.23 (s, 2H), 7.06 (t,  $J = 7.5$  Hz, 2H), 6.93 (d,  $J = 8.1$  Hz, 1H), 6.68 (s, 1H), 6.51 (s, 1H), 6.11 (d,  $J = 8.4$  Hz, 1H), 3.67 (s, 3H), 3.18 (s, 3H). **<sup>13</sup>C NMR** (101 MHz, DMSO)  $\delta$  178.0, 161.9, 156.6, 156.6, 151.0, 141.9, 137.2, 137.2, 136.5, 126.5, 119.3, 117.0, 114.0, 111.7, 109.8, 109.4, 109.2, 98.0, 56.0, 54.9, 51.0, 26.9. **HRMS** (ESI) calculated for  $C_{21}H_{16}N_4O_3[M + H]^+$ : 373.1295, found 373.1309.

(R)-2'-amino-5-methoxy-2-oxo-7'H-spiro[indoline-3,4'-pyrano[2,3-e]indole]-3'-carbonitrile (**4n**)

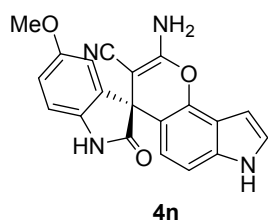

White solid, 27.9 mg, 78% yield, **m. p.** = 252-254°C,  $[\alpha]_D^{25} = +16.8$  ( $c = 0.1$ , MeOH). The ee value was 20% (Chiralpak AD-H, hexane/*i*-PrOH = 70:30, 220 nm, 1 mL/min,  $t_{major} = 16.78$  min,  $t_{minor} = 10.81$  min). **<sup>1</sup>H NMR** (400 MHz, DMSO-*d*<sub>6</sub>)  $\delta$  11.36 (s, 1H), 10.31 (s, 1H), 7.43–7.37 (m, 1H), 7.18 (s, 2H), 7.07 (d,  $J = 8.5$  Hz, 1H), 6.89–6.80 (m, 2H), 6.61 (d,  $J = 2.1$  Hz, 1H), 6.49 (s, 1H), 6.17 (d,  $J = 8.5$  Hz, 1H), 3.64 (s, 3H). **<sup>13</sup>C NMR** (101 MHz, DMSO)  $\delta$  179.9, 161.8, 156.0, 141.9, 137.3, 137.1, 135.6, 126.4, 119.5, 119.3, 117.0, 114.3, 111.6, 110.7, 109.4, 109.4, 98.0, 55.9, 55.1, 51.5. **HRMS** (ESI) calculated for  $C_{20}H_{14}N_4O_3[M + H]^+$ : 359.1139, found 359.1143.

2'-amino-1-benzyl-5-bromo-2-oxo-7'H-spiro[indoline-3,4'-pyrano[2,3-e]indole]-3'-carbonitrile (**4o**)

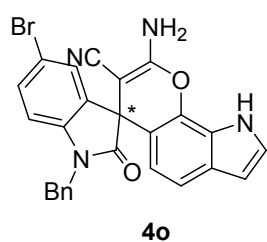

Brown solid, 44.4 mg, 89% yield, **m. p.** = 271-273°C,  $[\alpha]_D^{25} = +8.1$  ( $c = 0.1$ , MeOH). The ee value was 14% (Chiralpak AD-H, hexane/*i*-PrOH = 70:30, 220 nm, 1 mL/min,  $t_{major} = 47.93$  min,  $t_{minor} = 9.46$  min). **<sup>1</sup>H NMR** (400 MHz, DMSO-*d*<sub>6</sub>)  $\delta$  11.38 (s, 1H), 7.48 (d,  $J = 8.3$  Hz, 1H), 7.42 (s, 1H), 7.32 (dq,  $J = 19.4, 7.5, 6.1$  Hz, 6H), 7.20 (d,  $J = 9.3$  Hz, 3H), 6.98 (d,  $J = 8.4$  Hz, 1H), 6.47 (s, 1H), 6.04 (d,  $J = 8.2$  Hz, 1H), 5.07–4.88 (m, 2H). **<sup>13</sup>C NMR** (101 MHz, DMSO)  $\delta$  177.9, 161.6, 142.1, 137.3, 136.2, 136.1, 132.3, 130.3, 129.1, 128.1, 128.0, 127.6, 127.0, 124.1, 119.1, 117.5, 116.7, 115.7, 112.1, 110.7, 102.6, 54.8, 50.9, 43.6. **HRMS** (ESI) calculated for  $C_{26}H_{17}BrN_4O_2[M + H]^+$ : 497.0606, found 497.0615.

5. NMR spectra of catalyst 1j and addition products 4a-4o

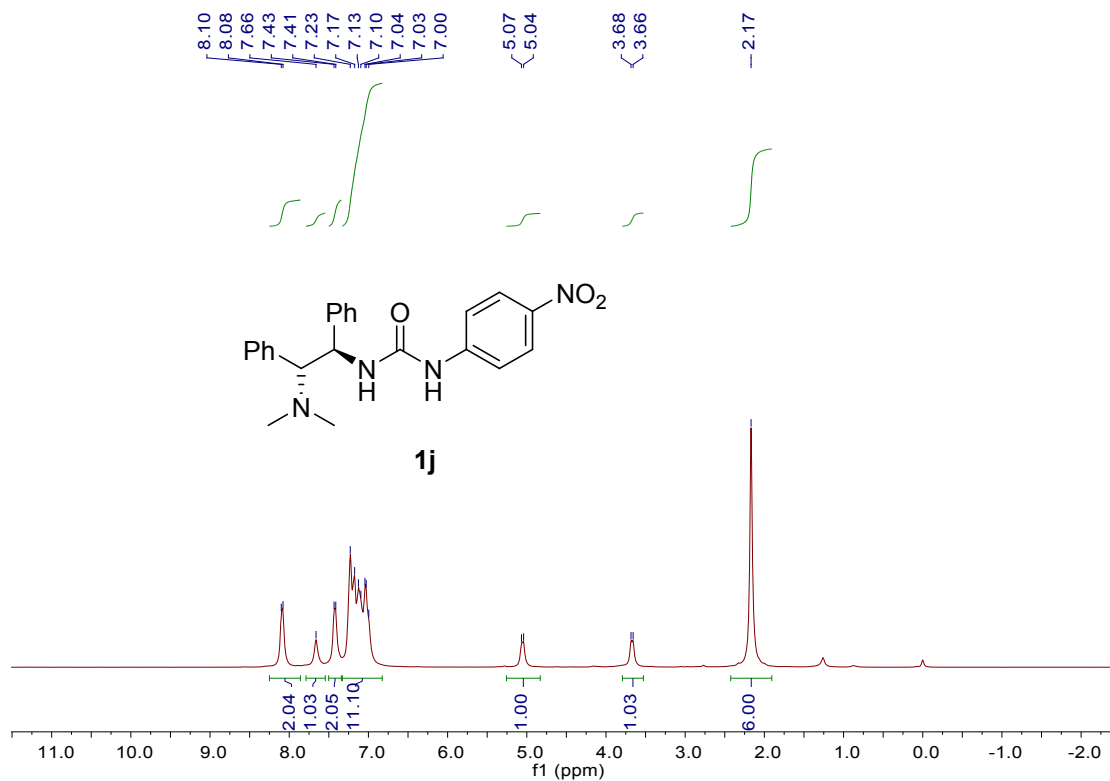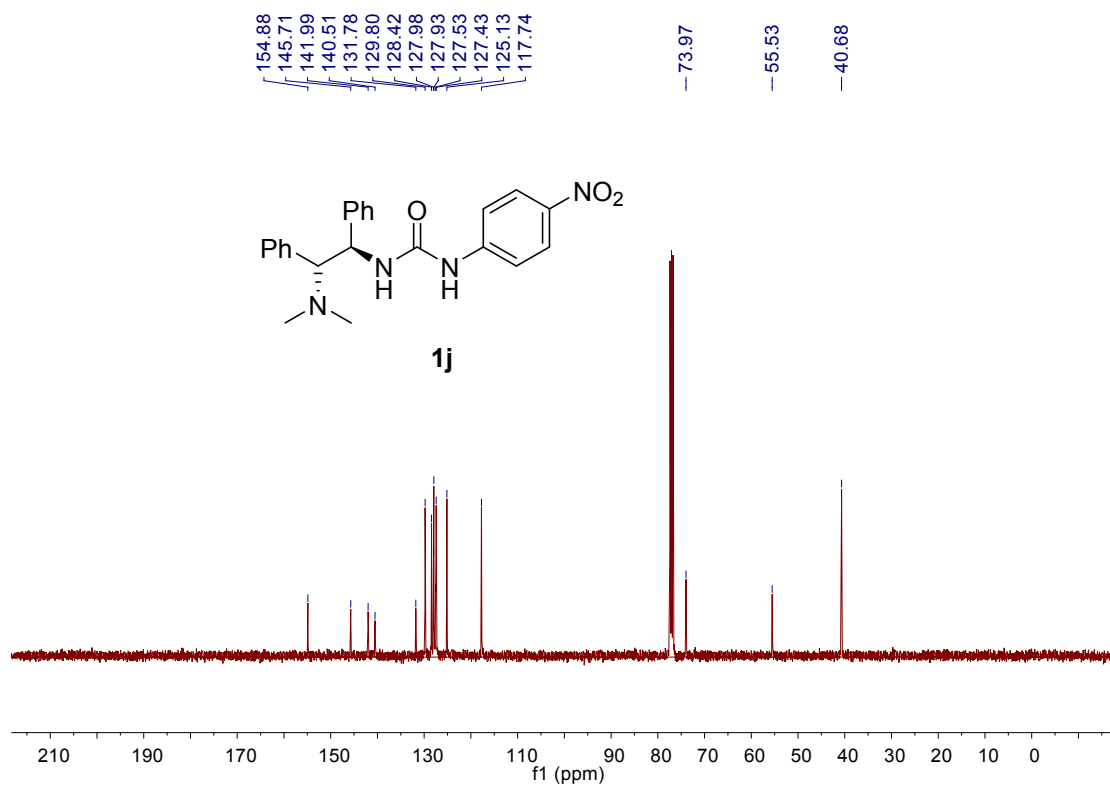



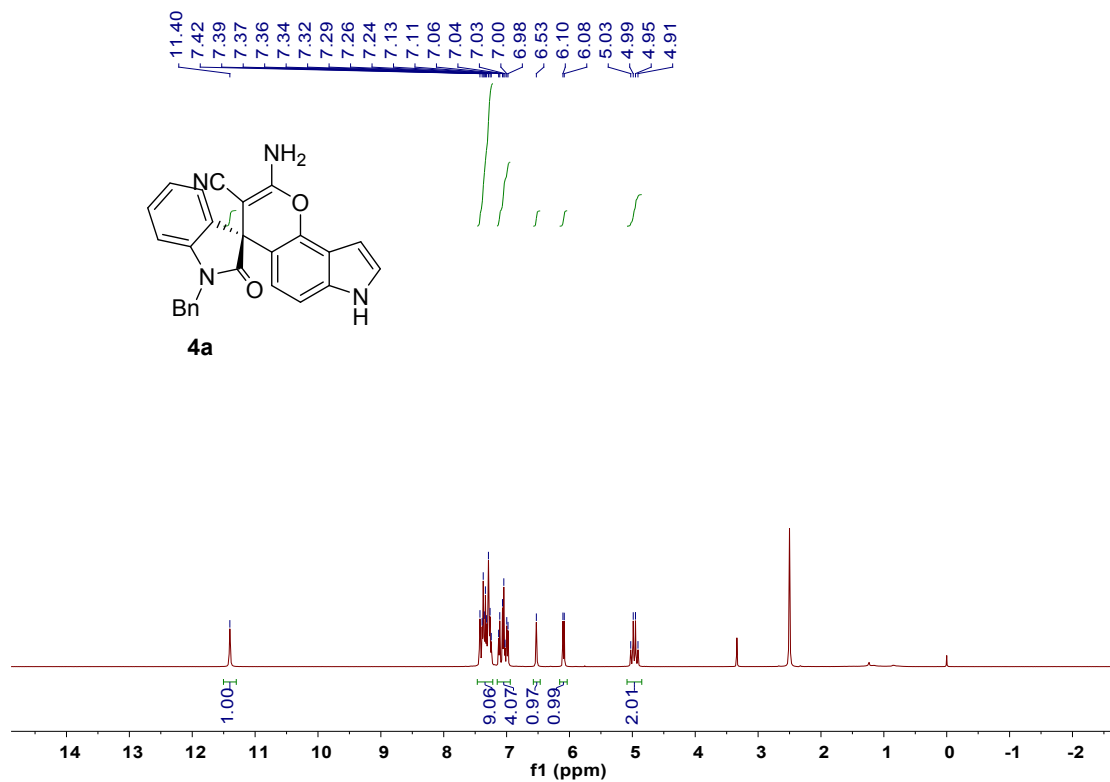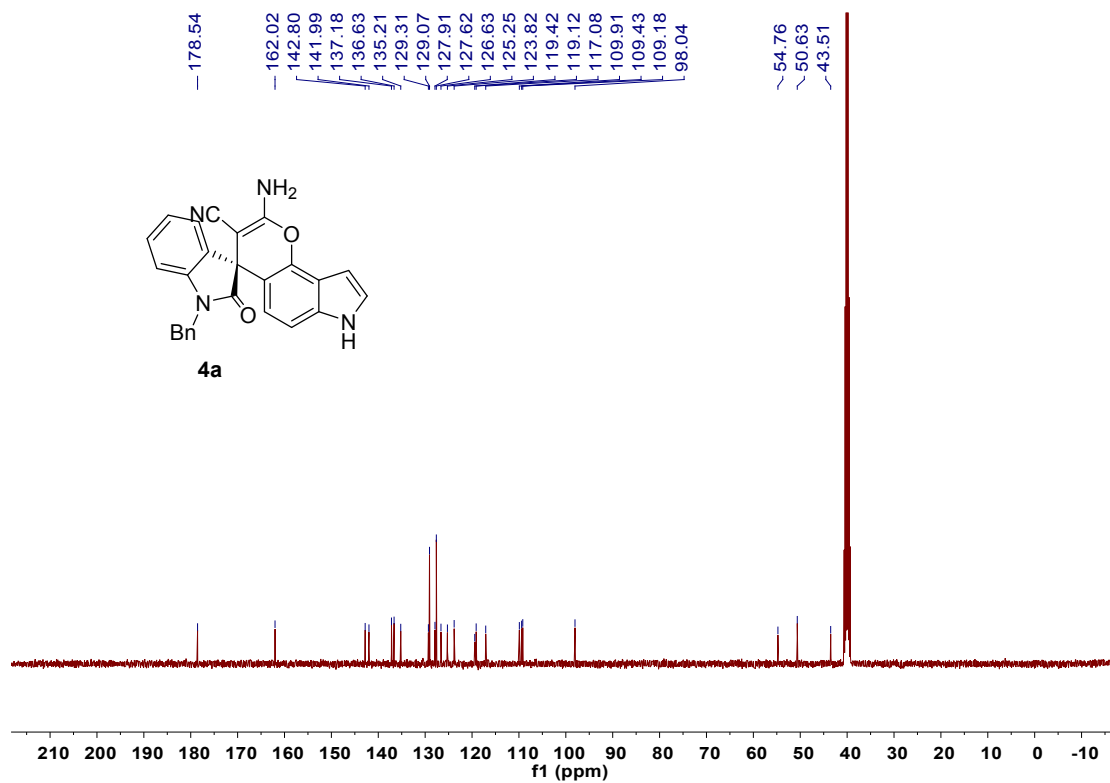

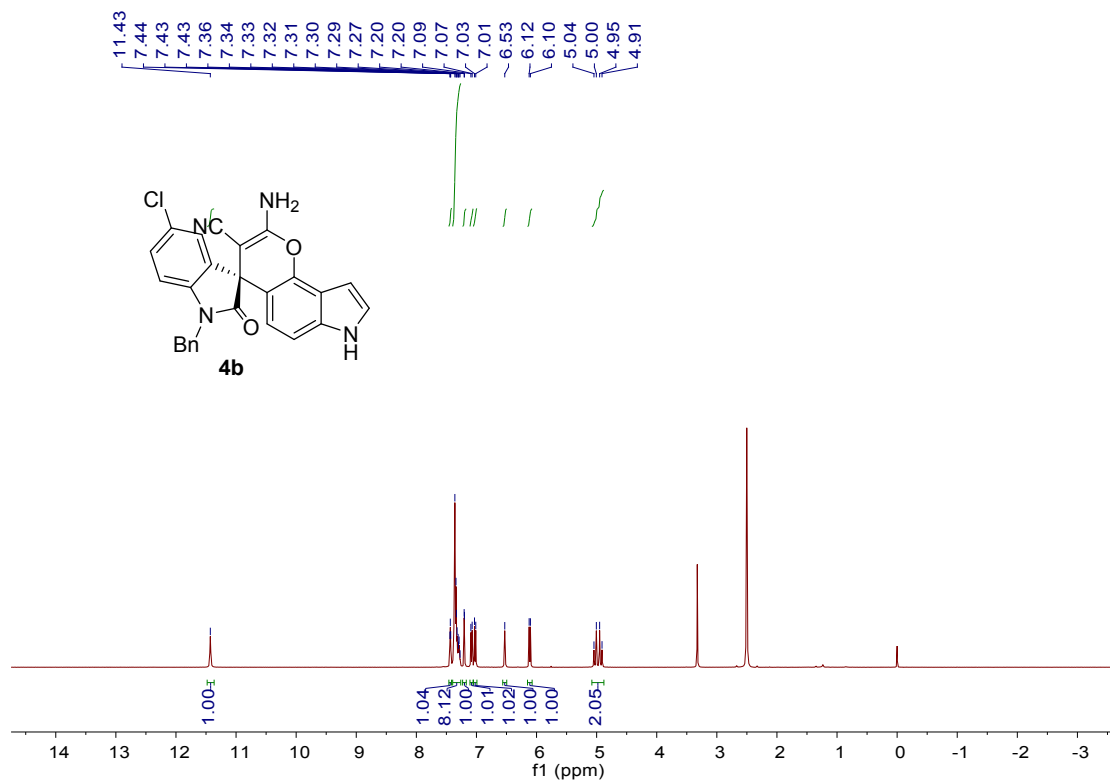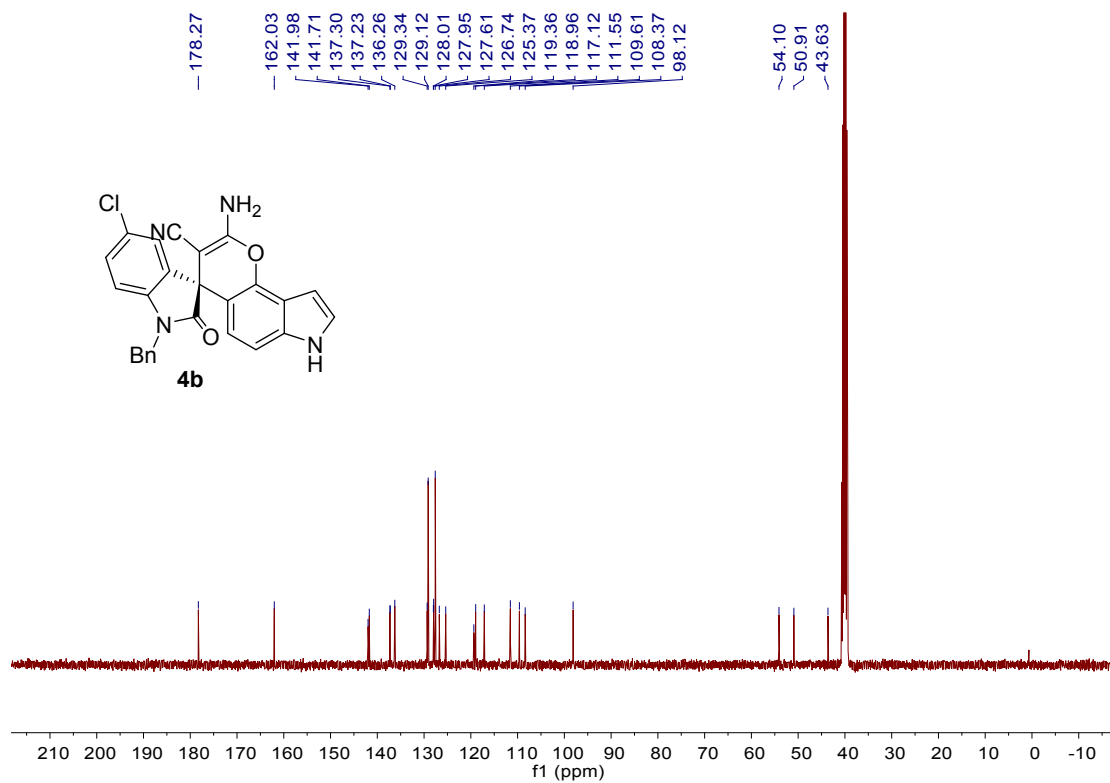

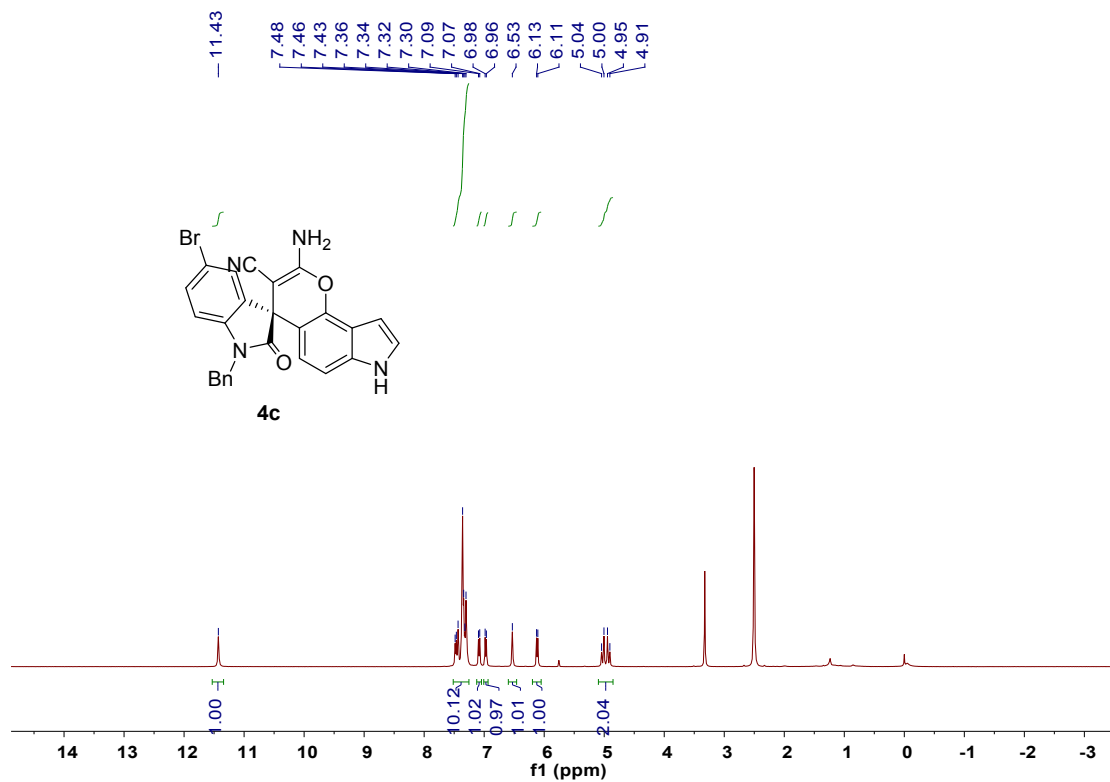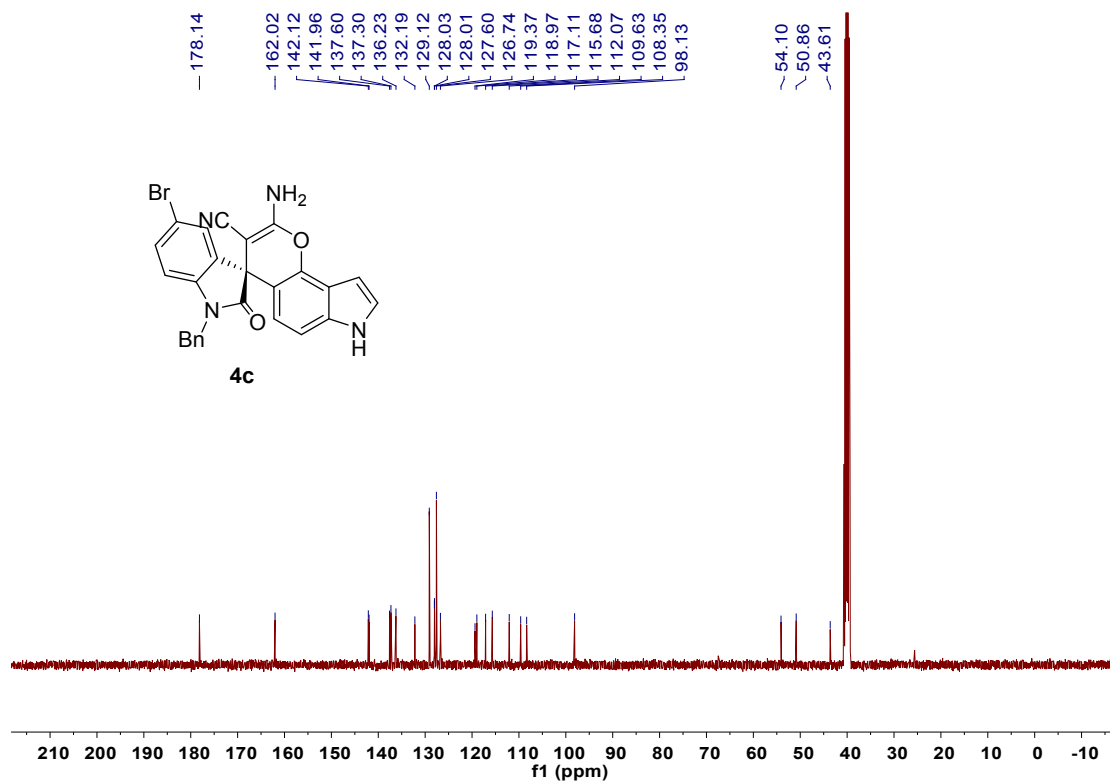

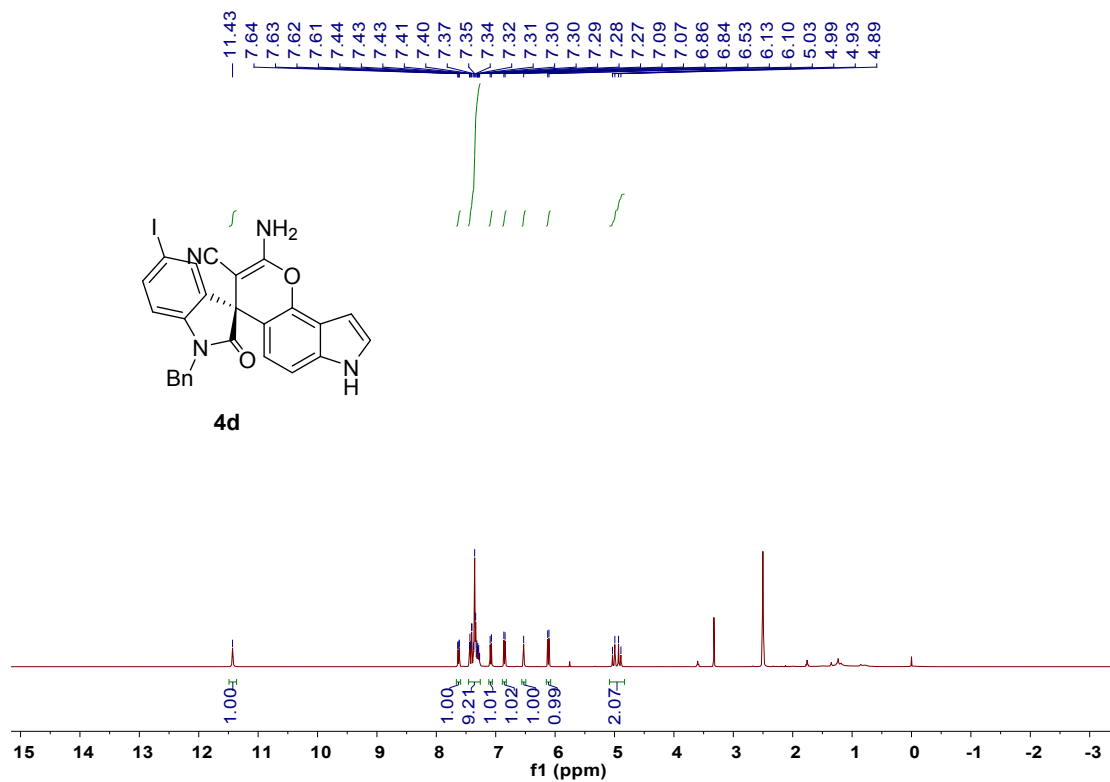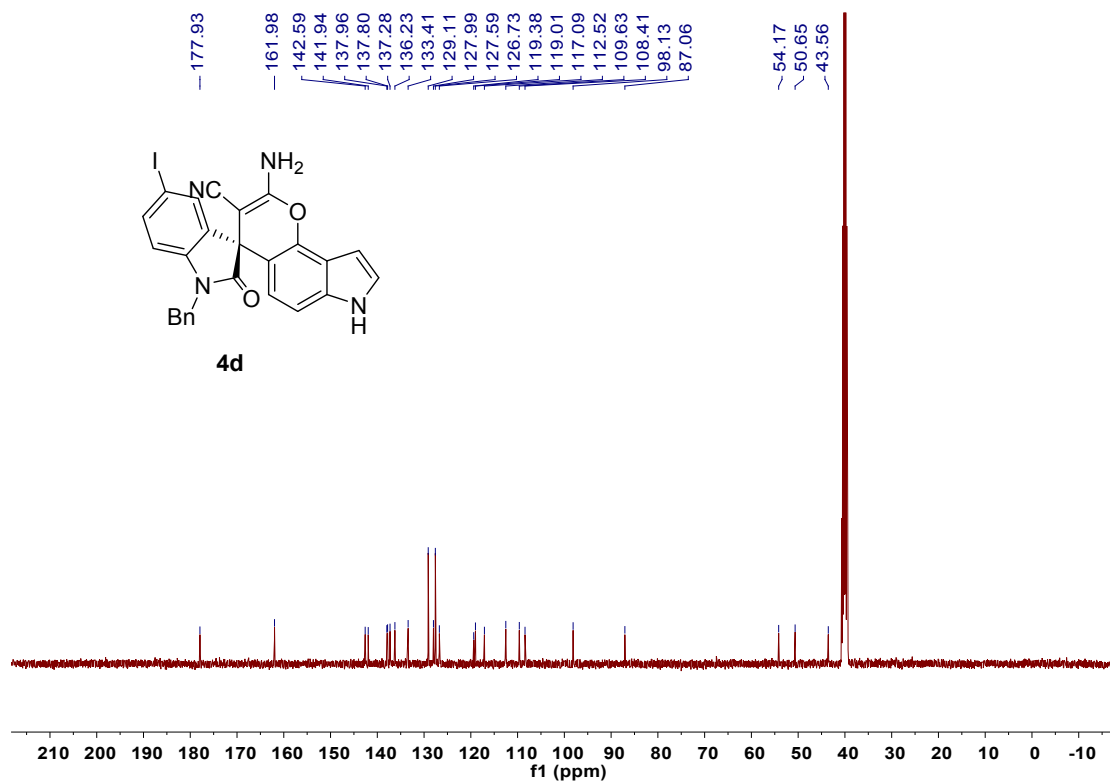

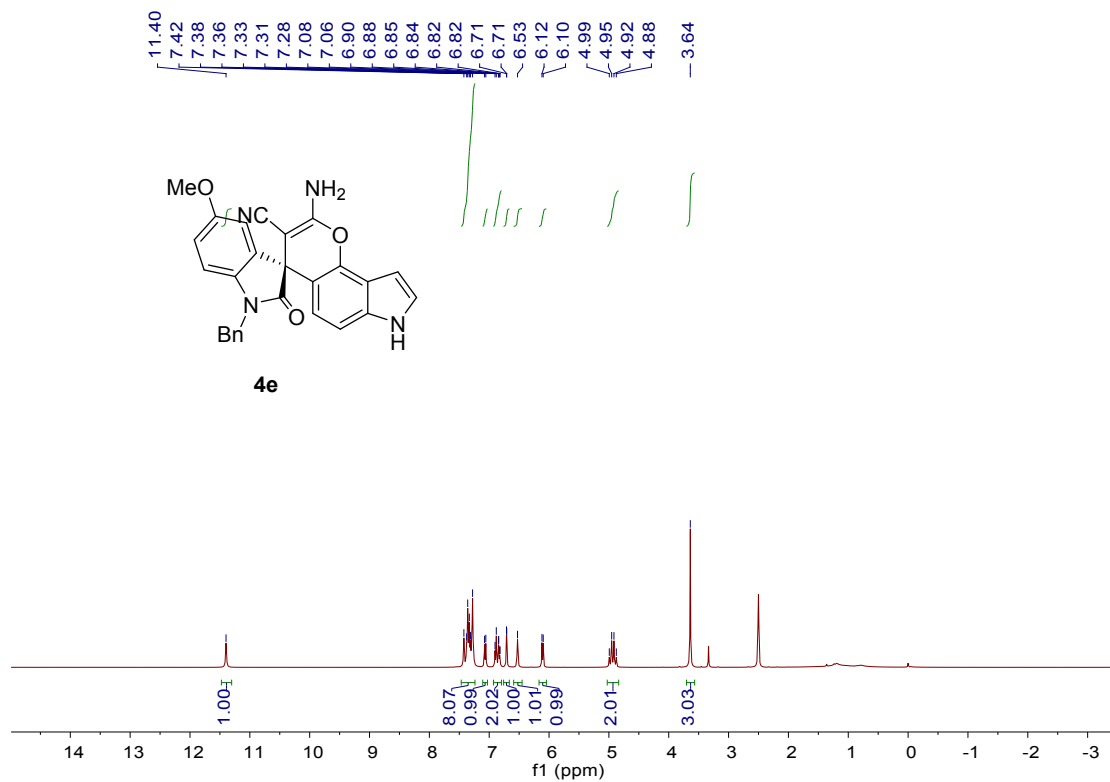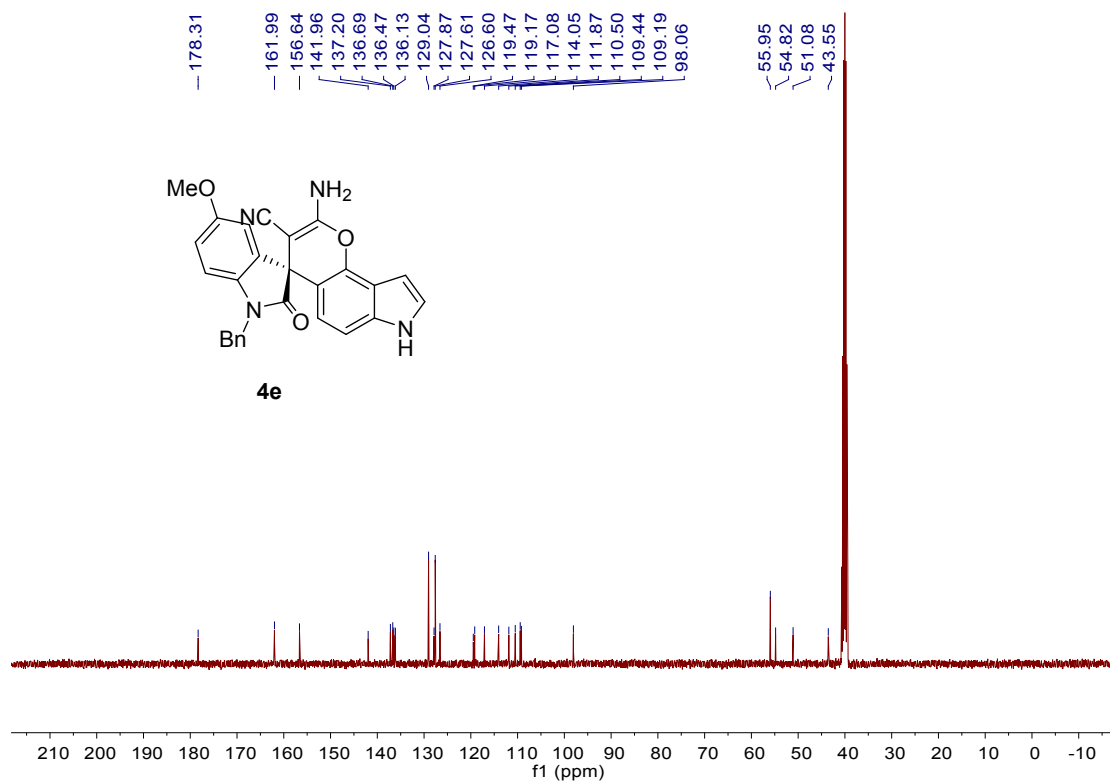

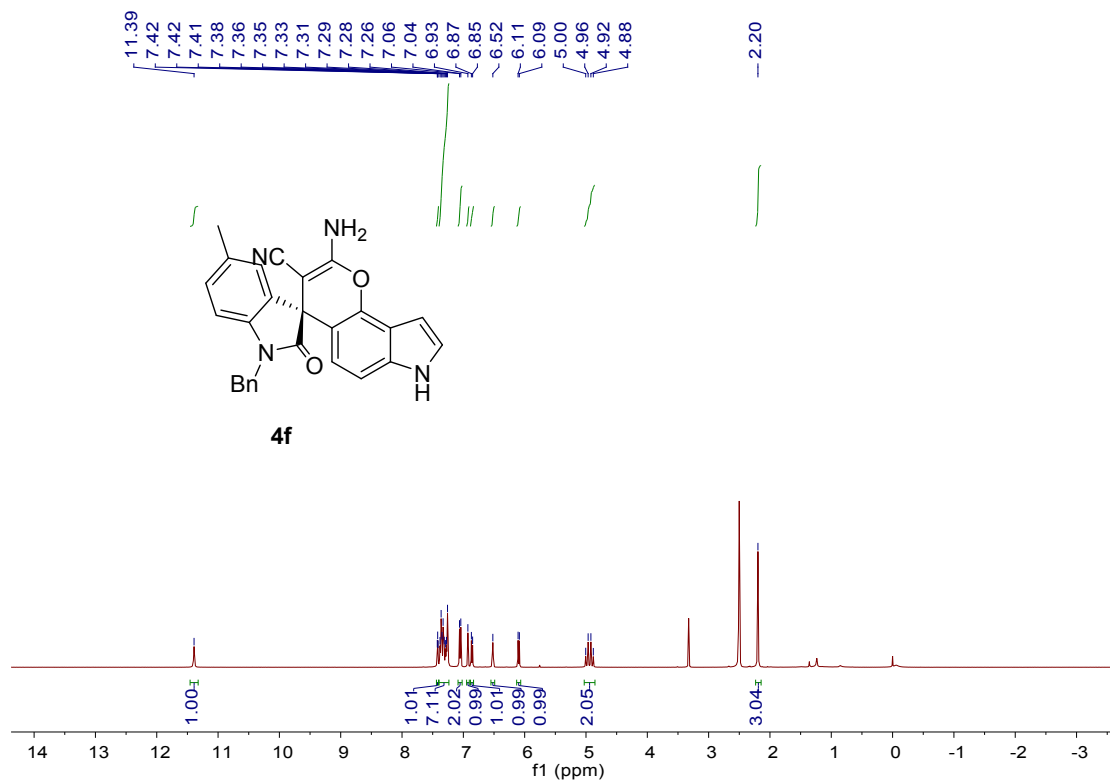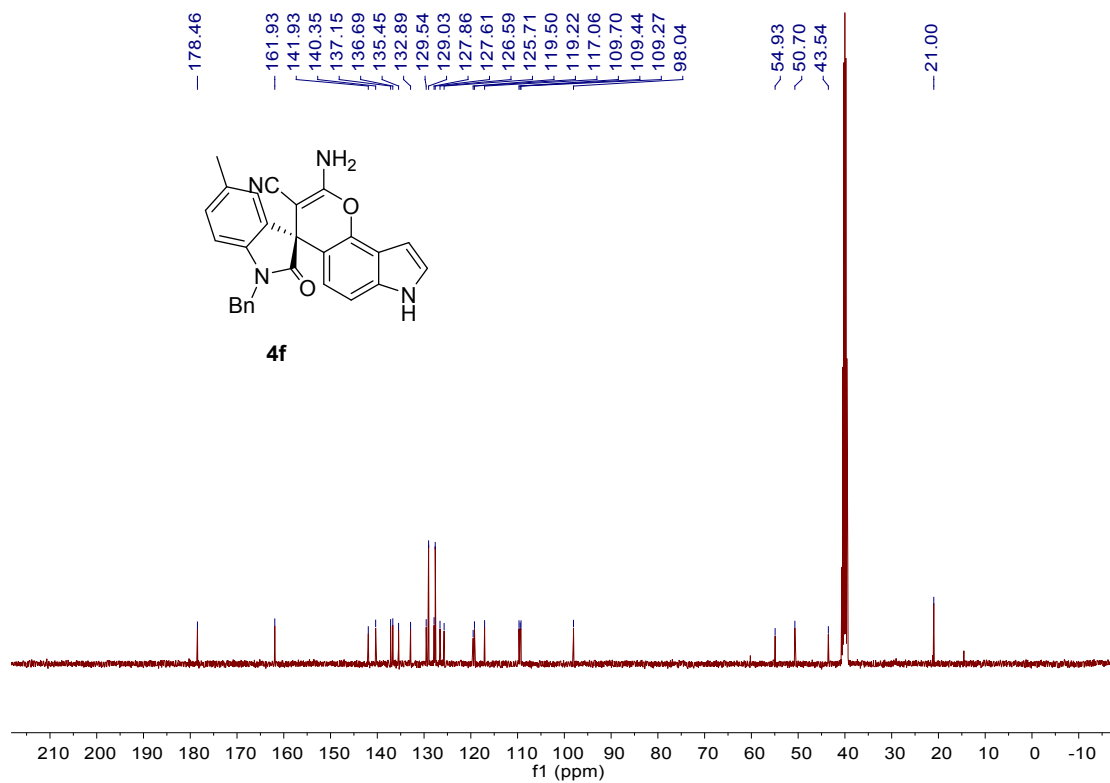

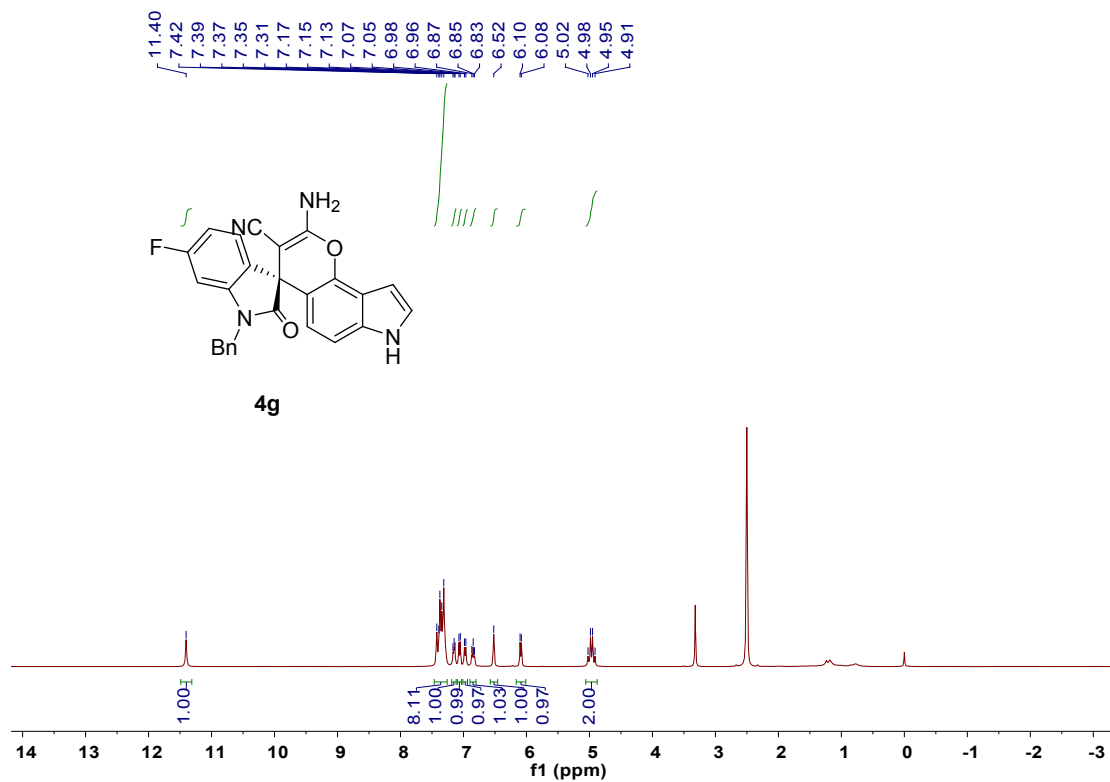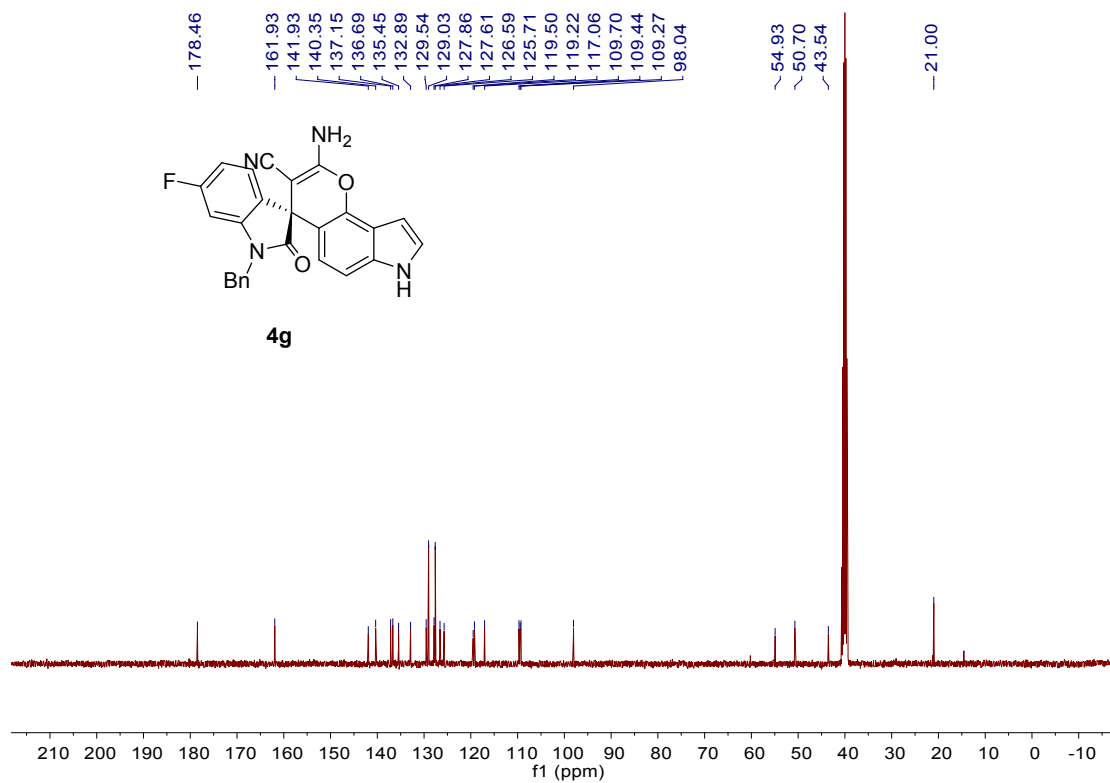

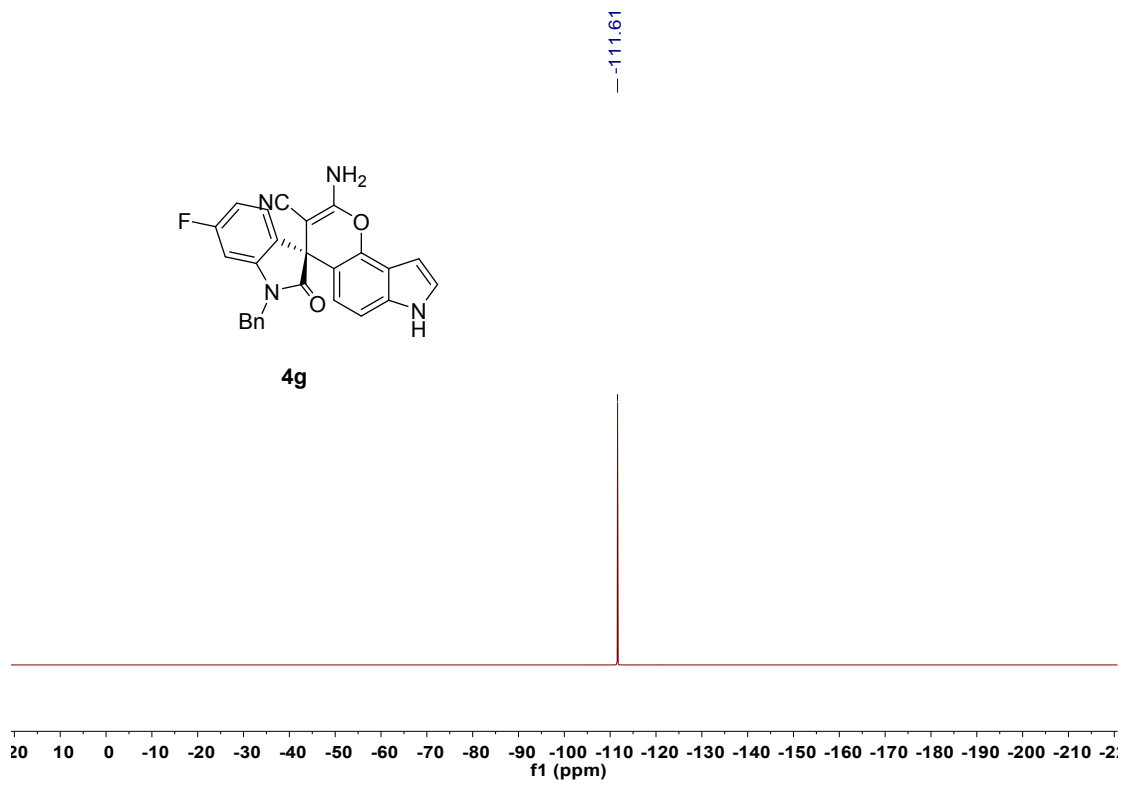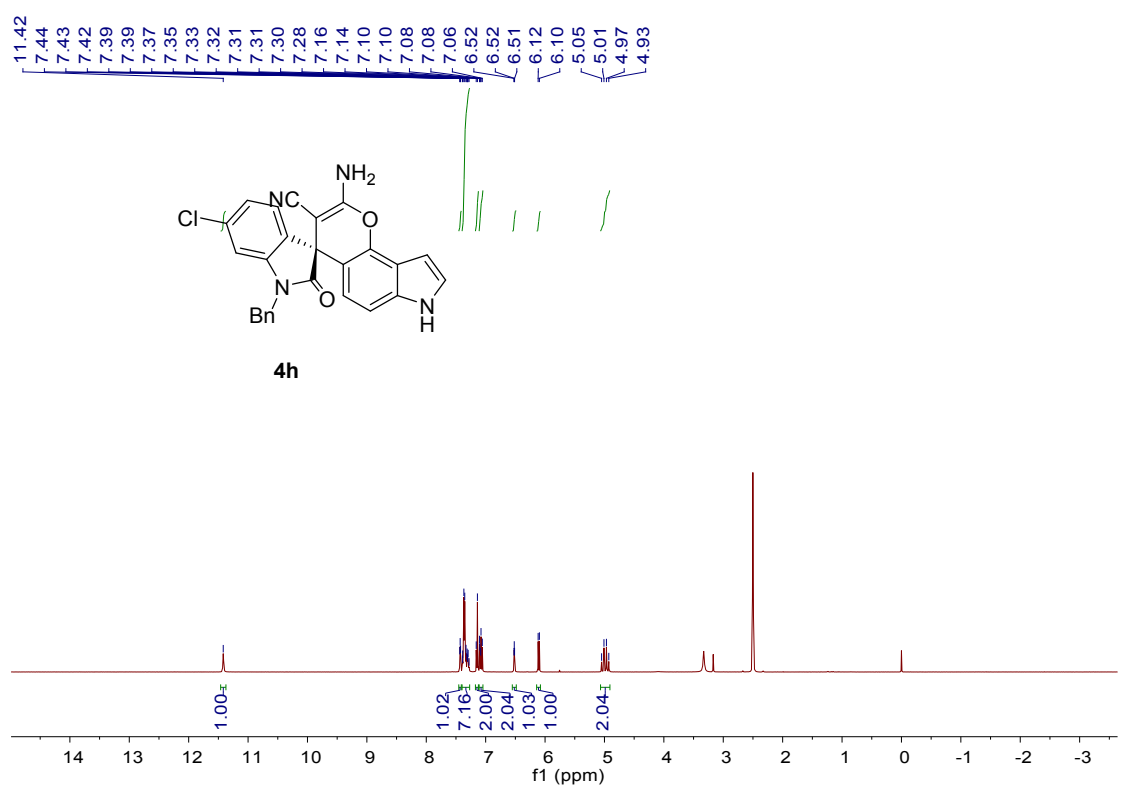



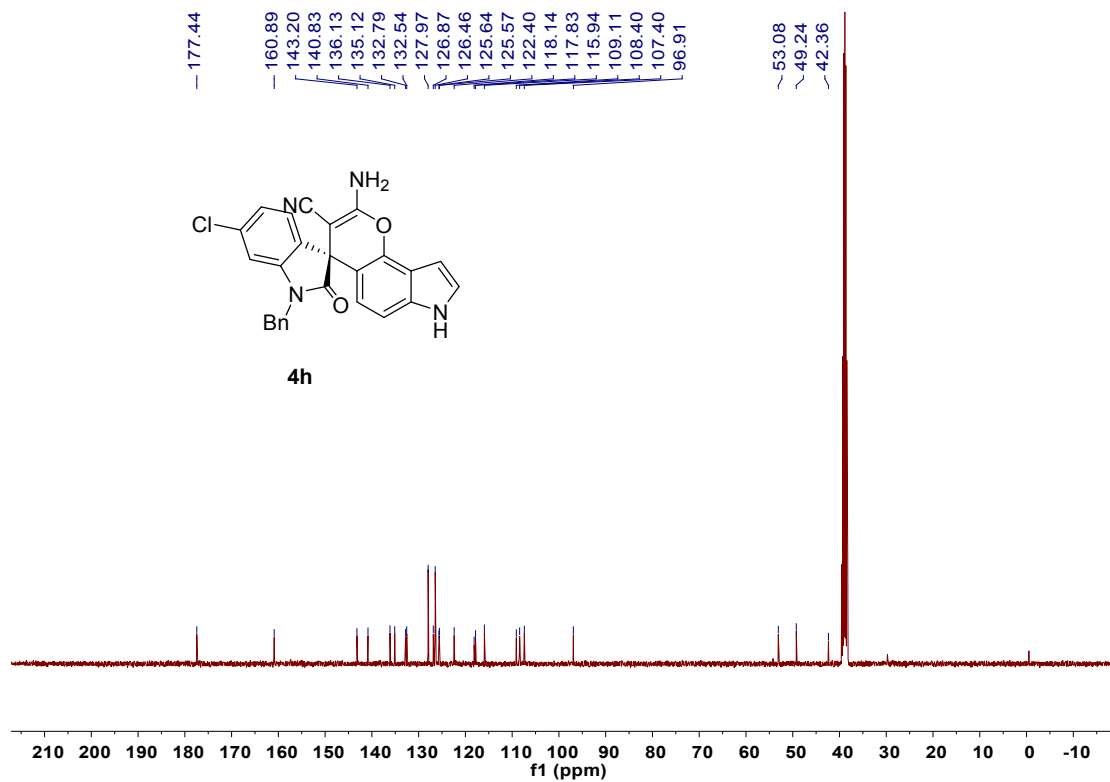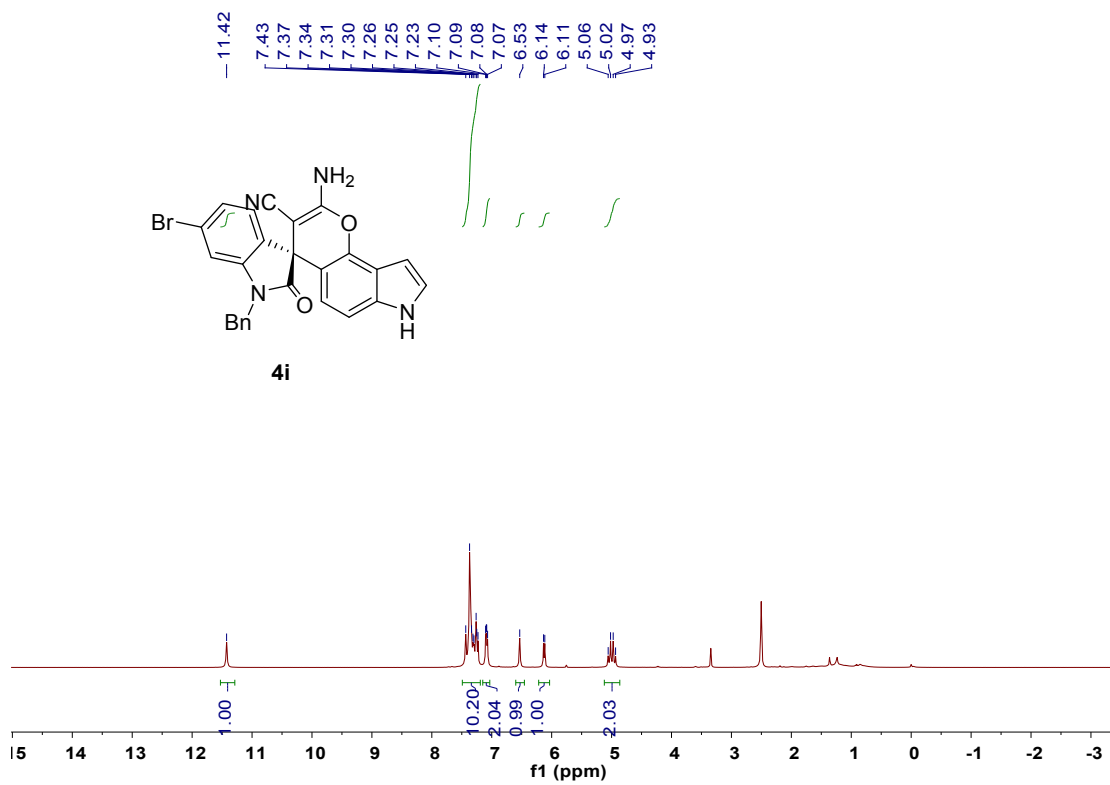

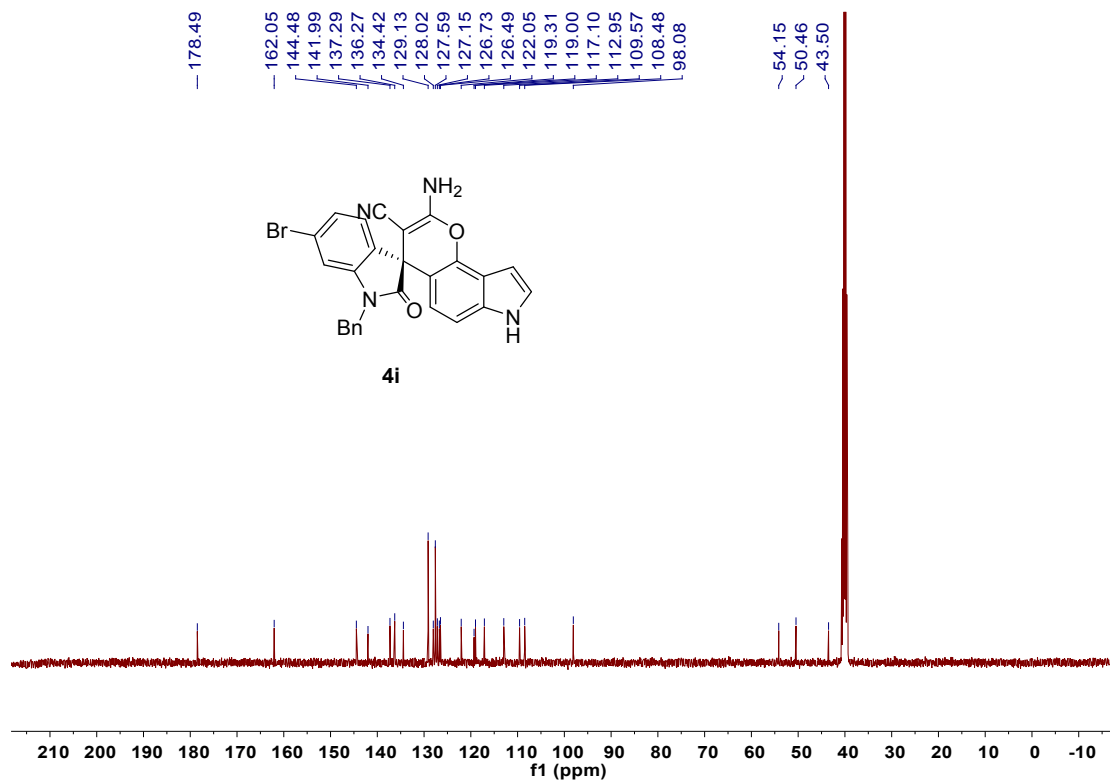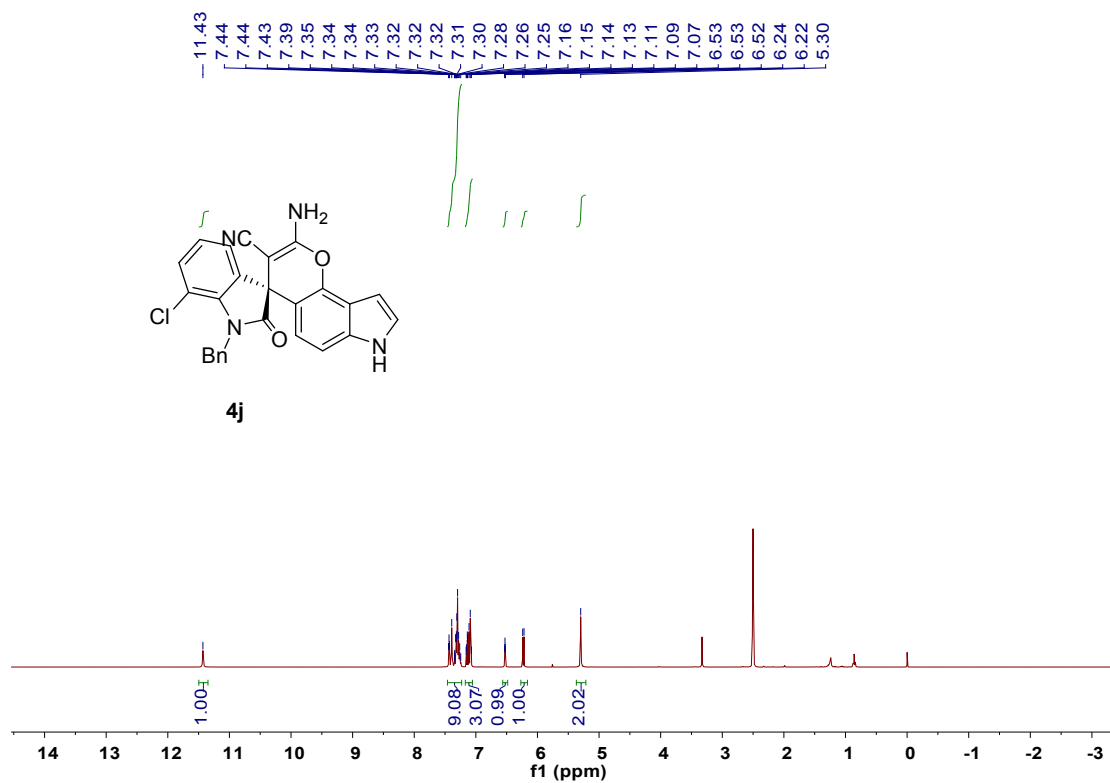

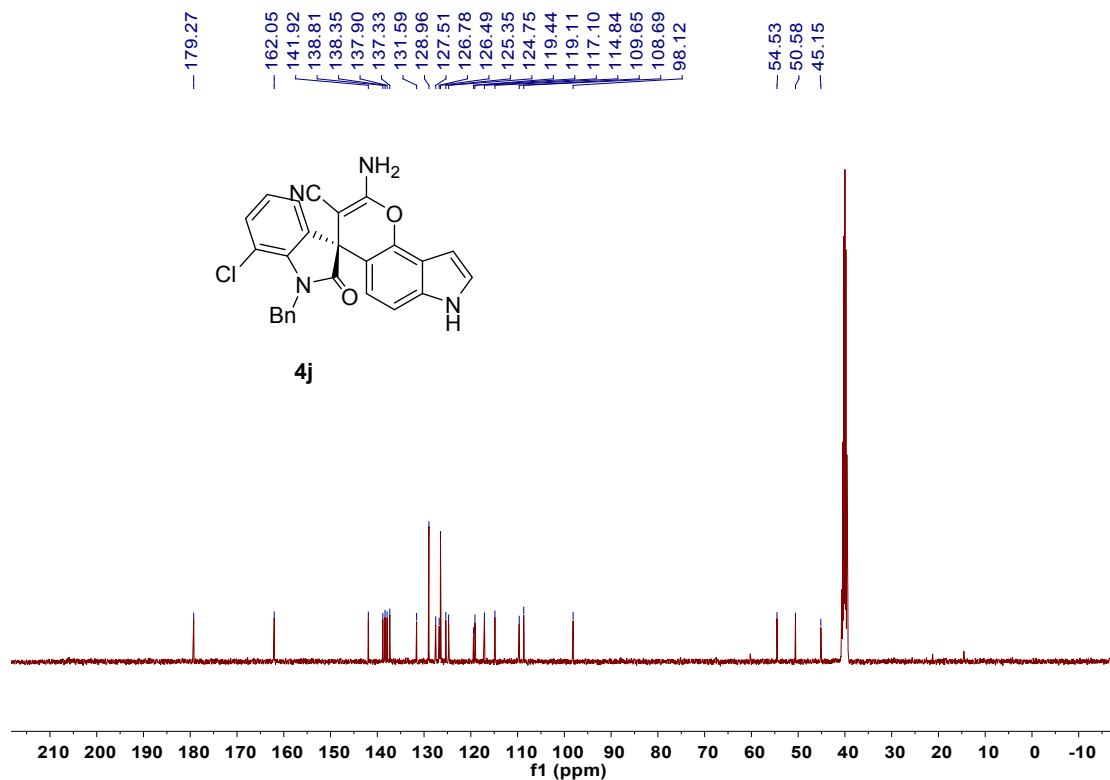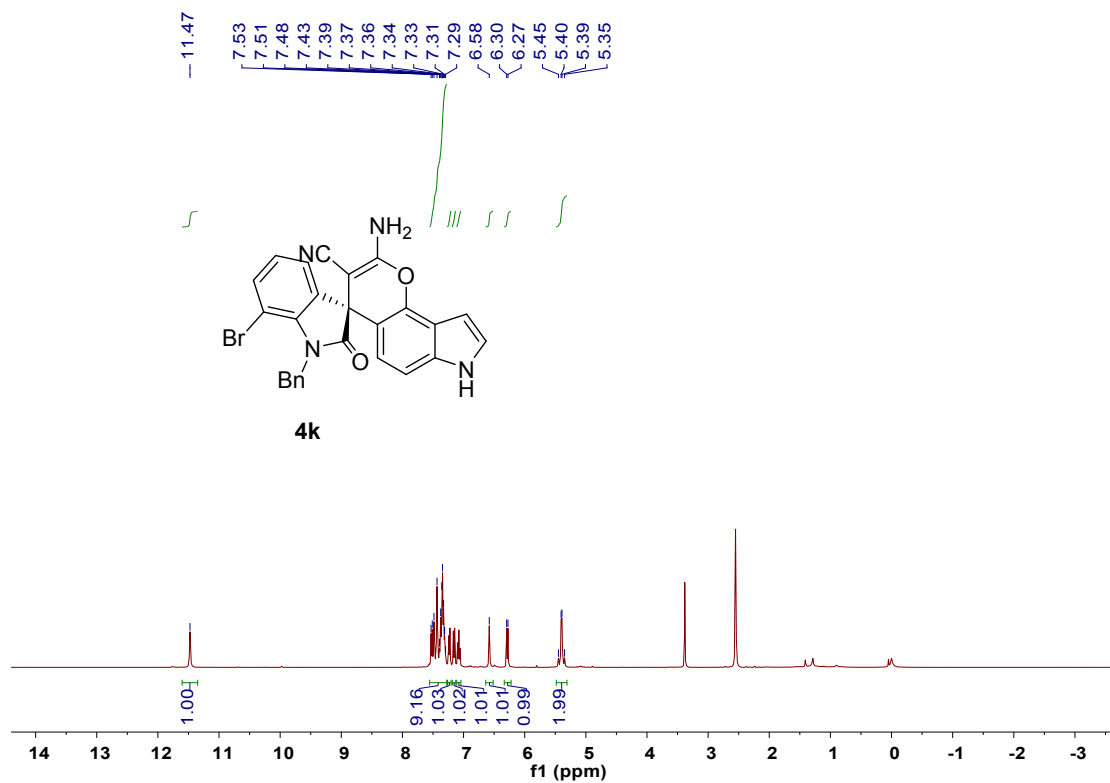

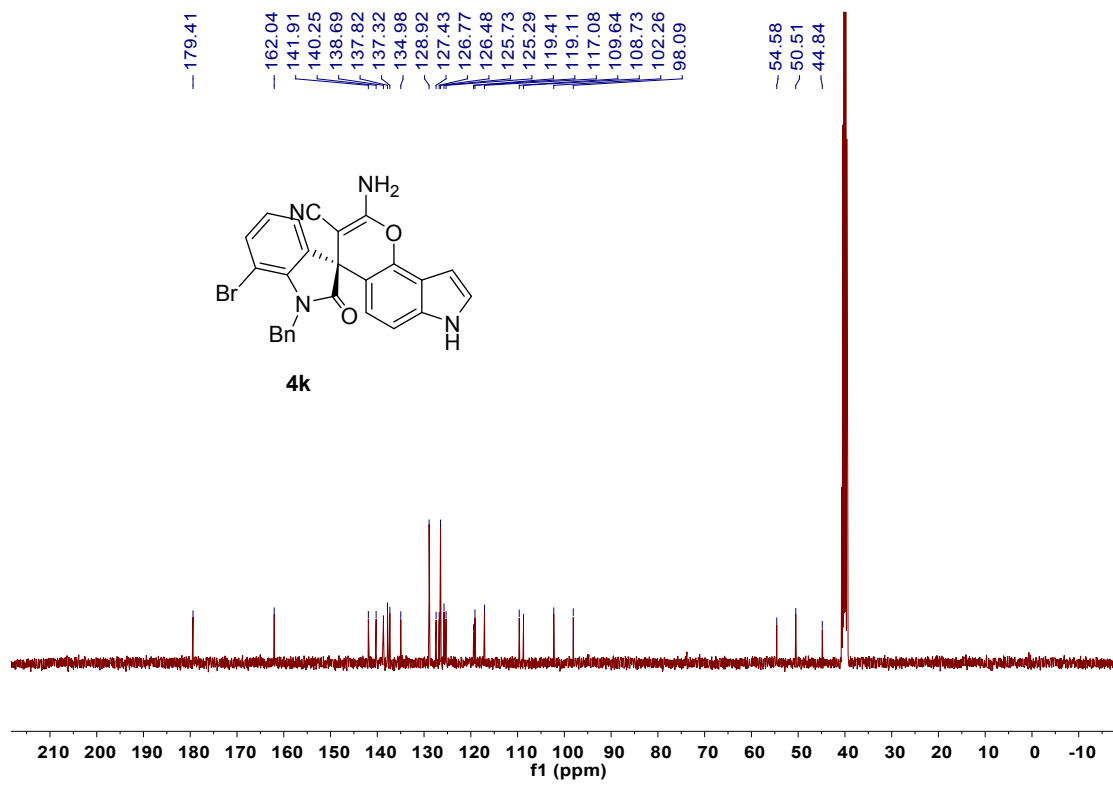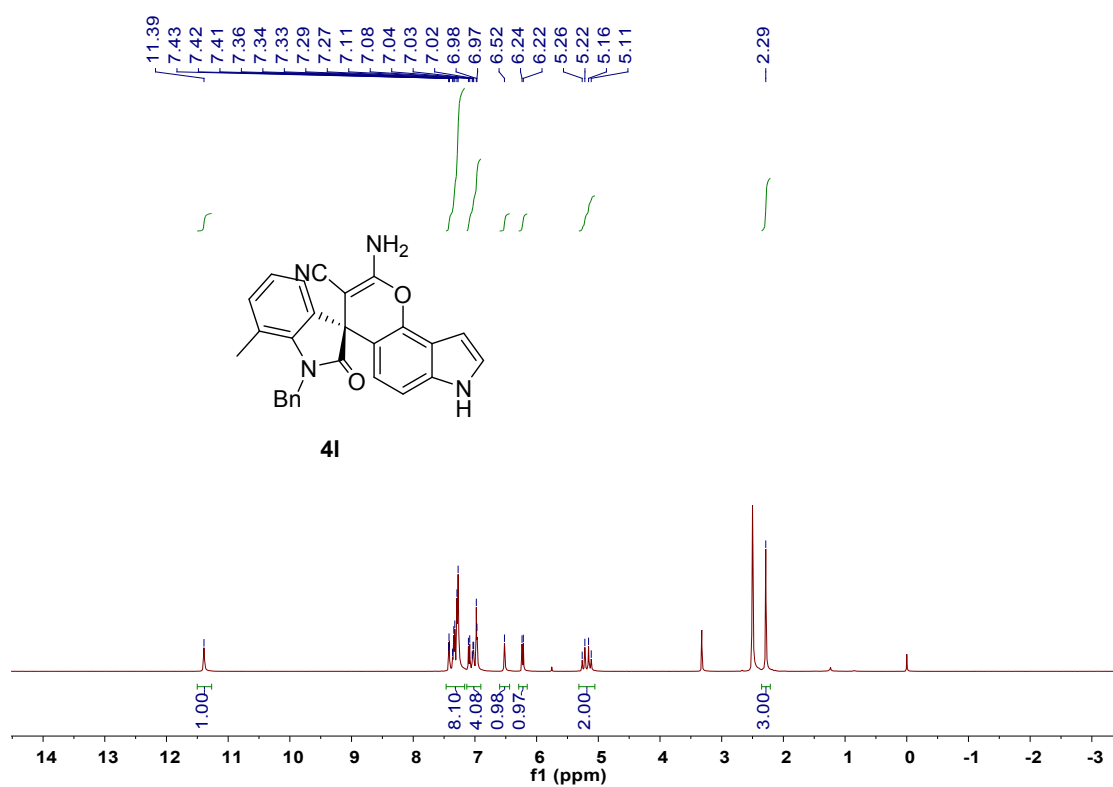

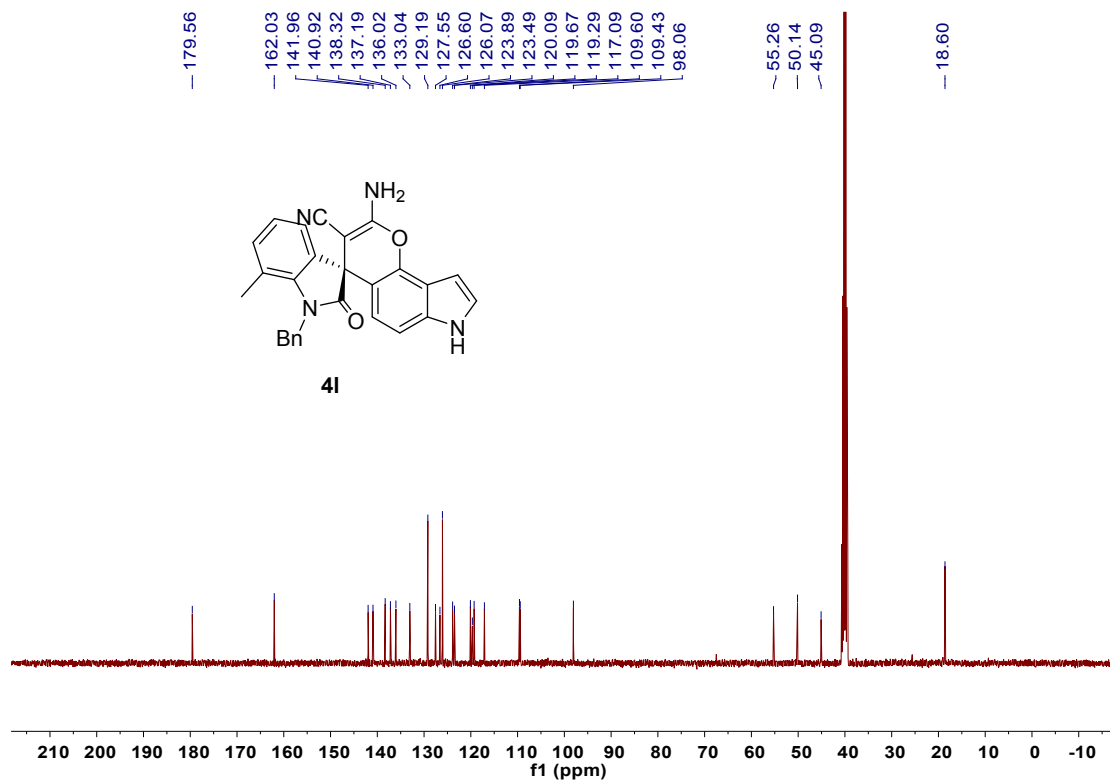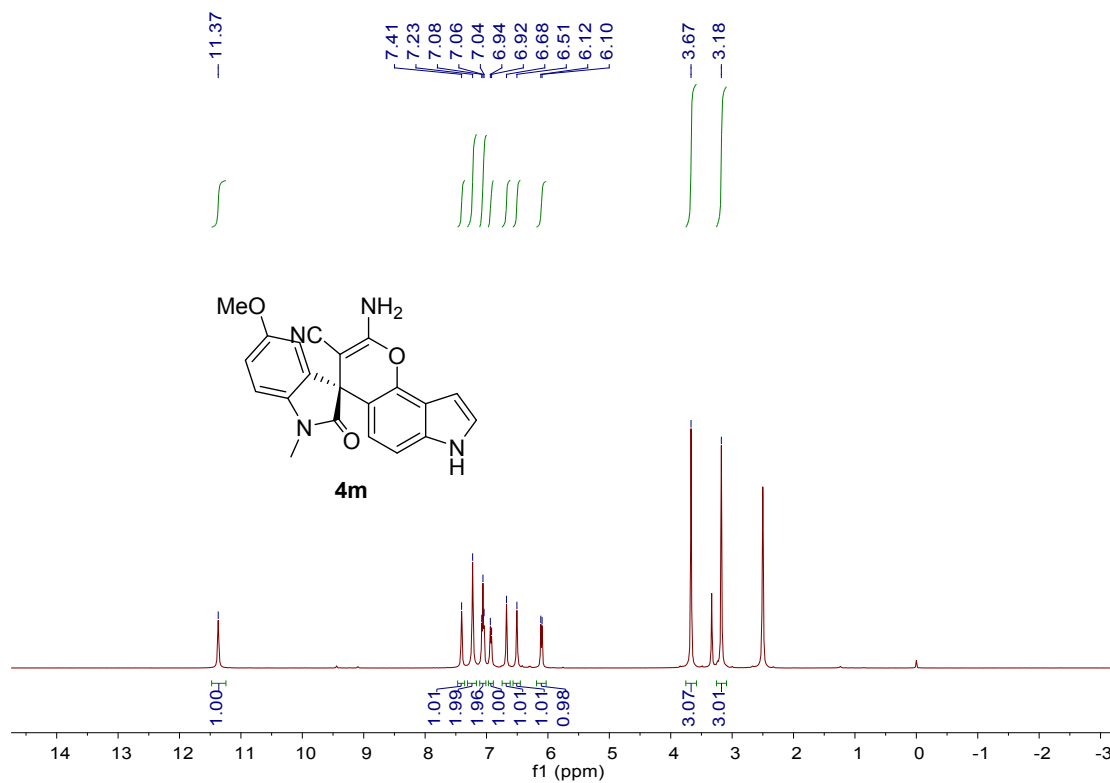

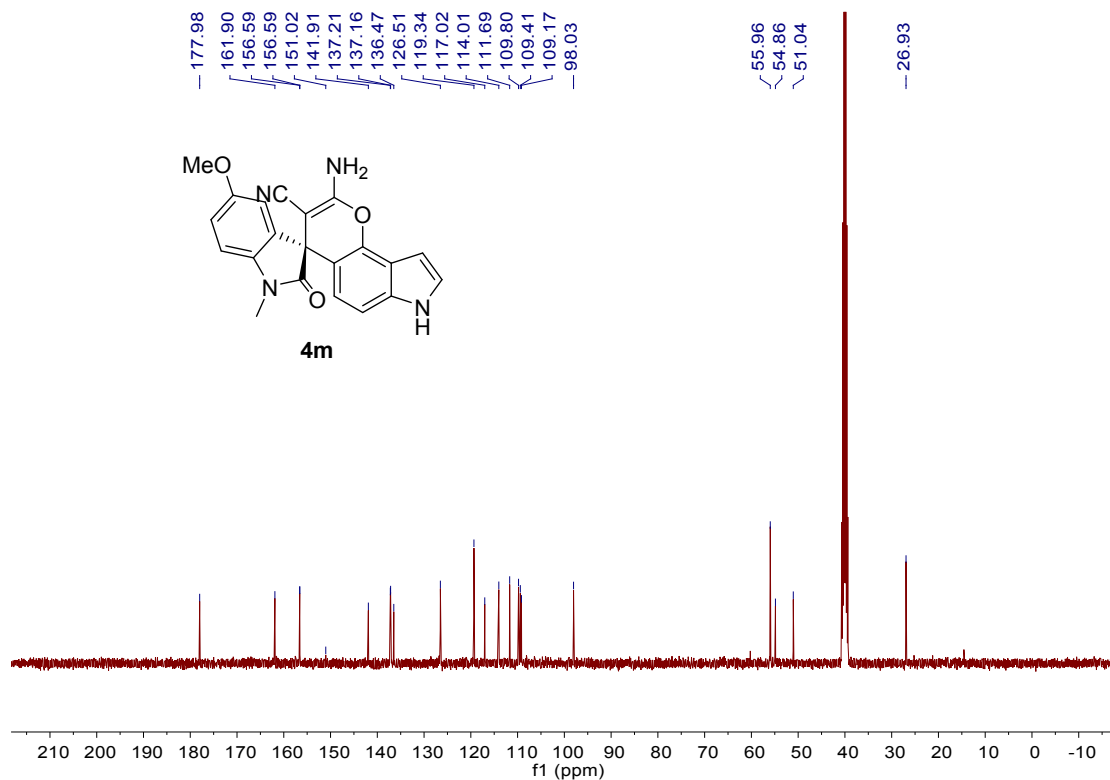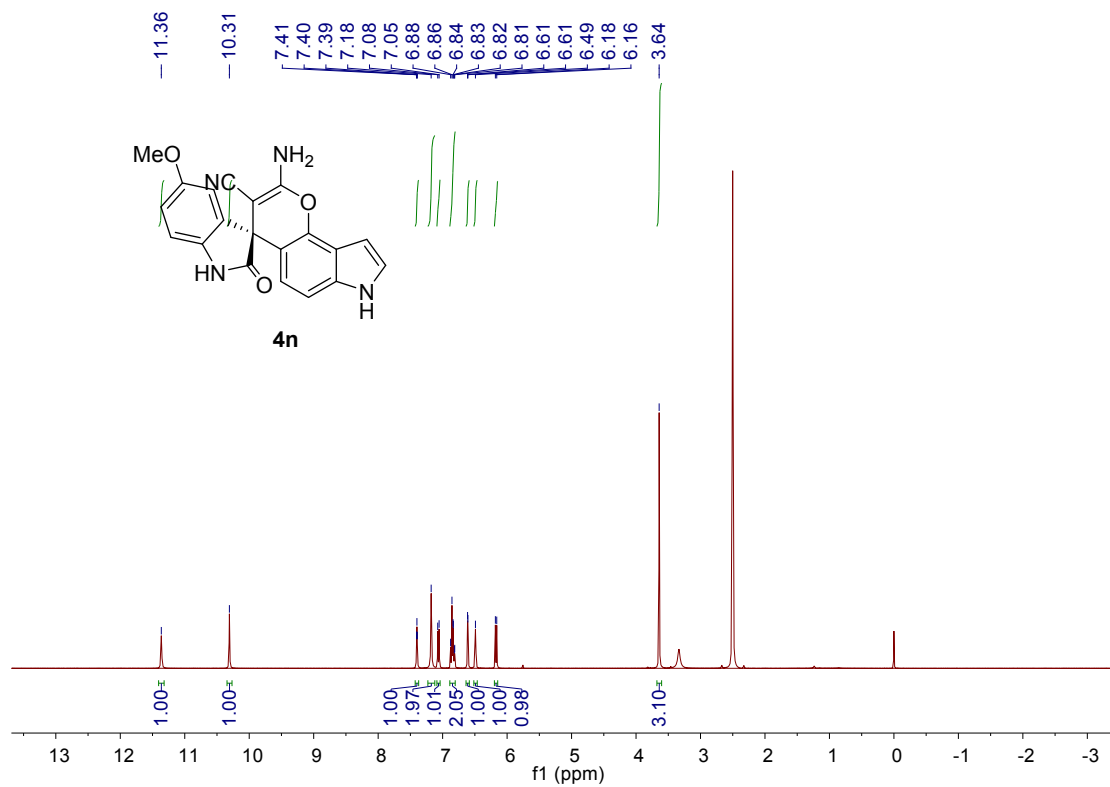

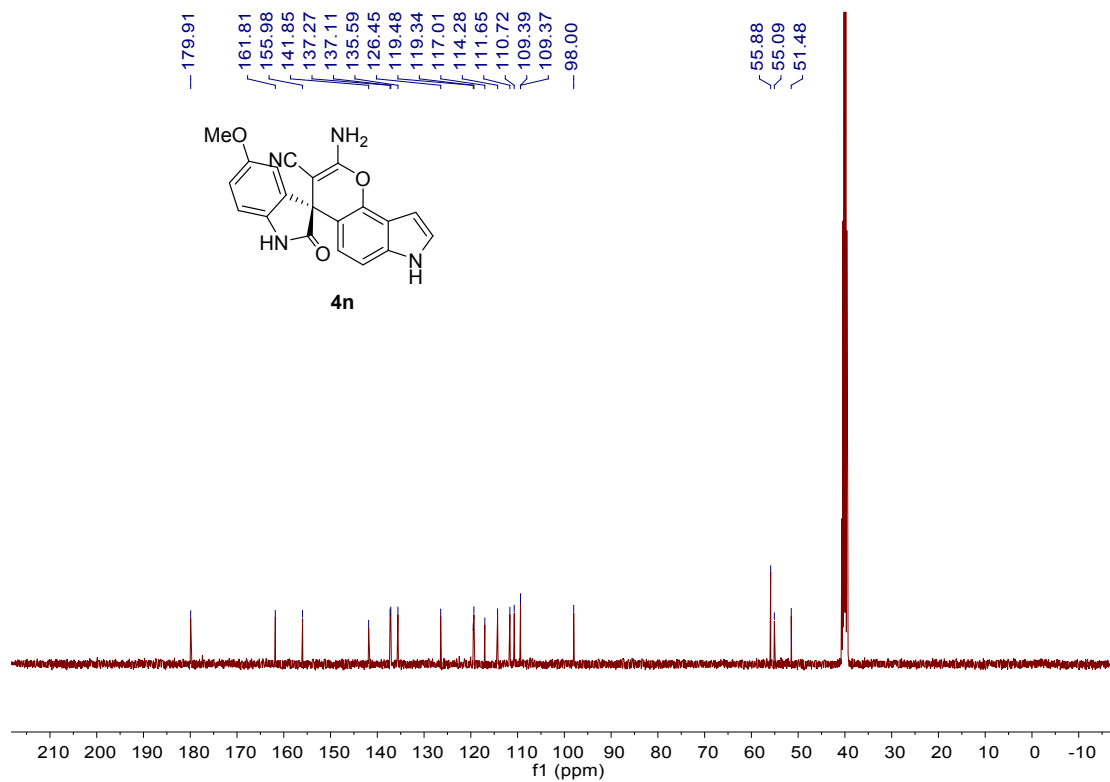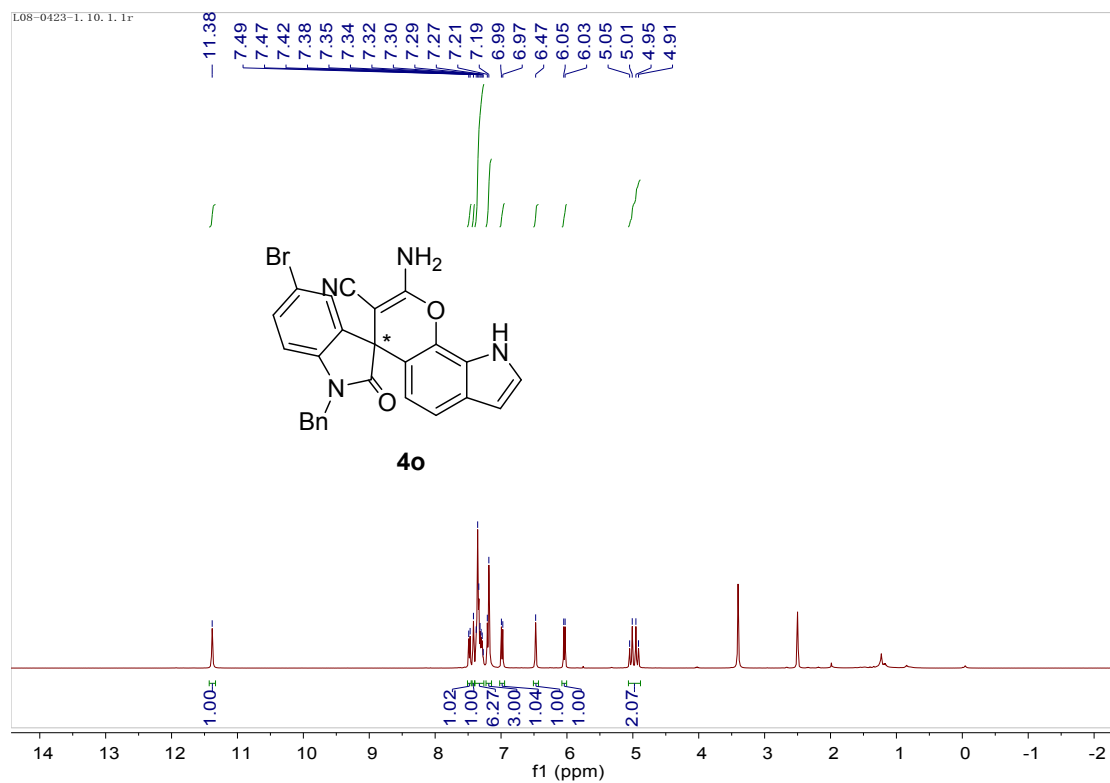

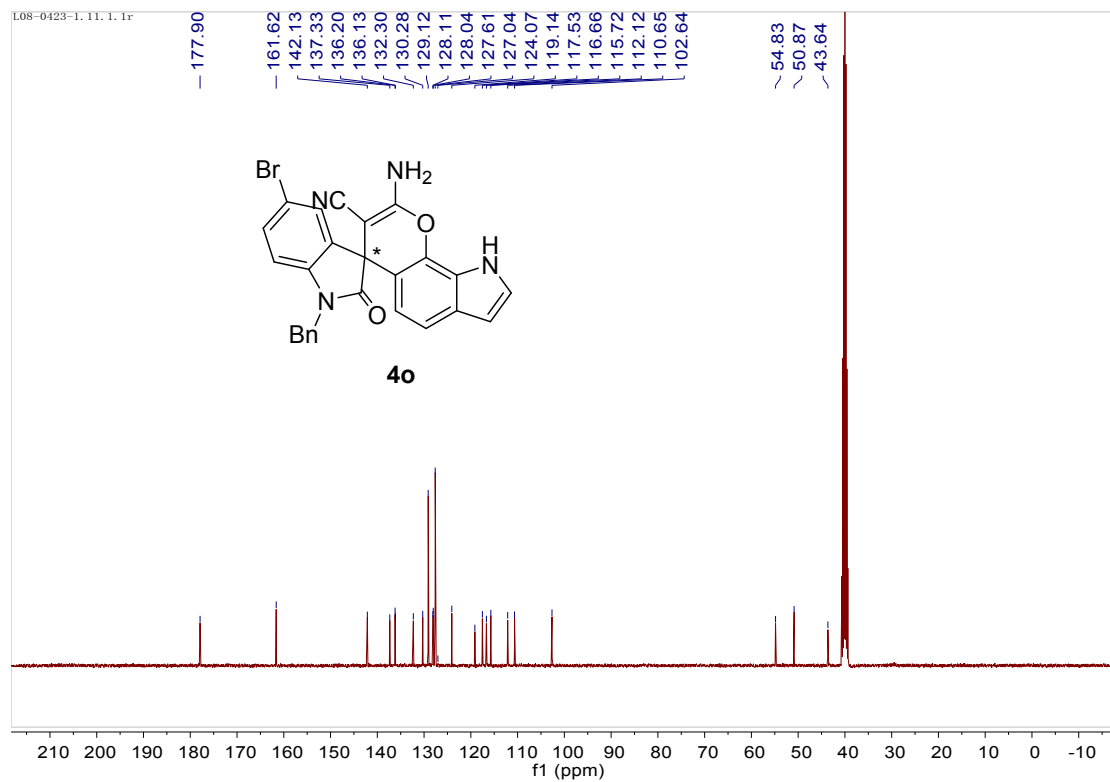



## 6. HPLC traces of compounds 4a-4o.

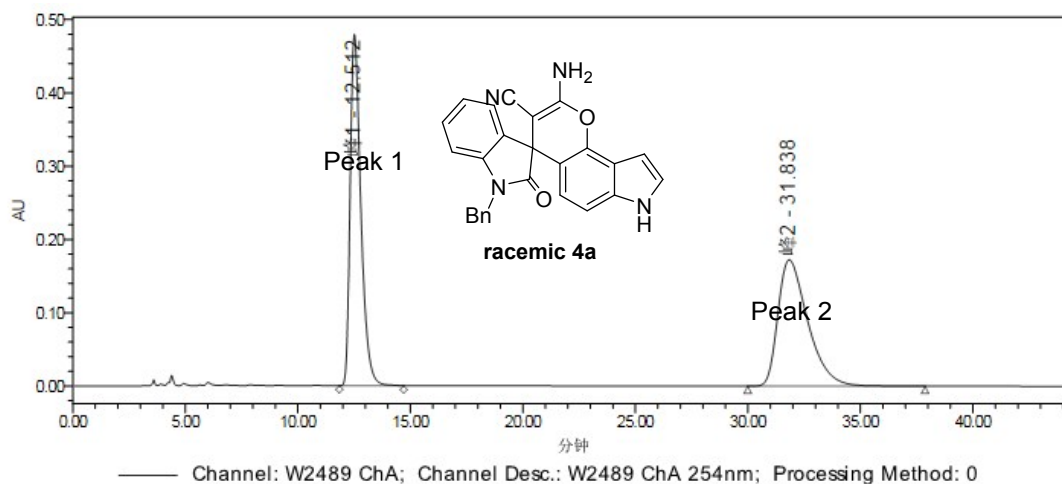

|   | Channel Description | Peak Name | RT (min) | Area (峰*sec)<br>μAU*sec | % Area | Height (峰)<br>μAU |
|---|---------------------|-----------|----------|-------------------------|--------|-------------------|
| 1 | W2489 ChA 254nm     | 峰1        | 12.512   | 15839375                | 49.93  | 479050            |
| 2 | W2489 ChA 254nm     | 峰2        | 31.838   | 15882636                | 50.07  | 172434            |

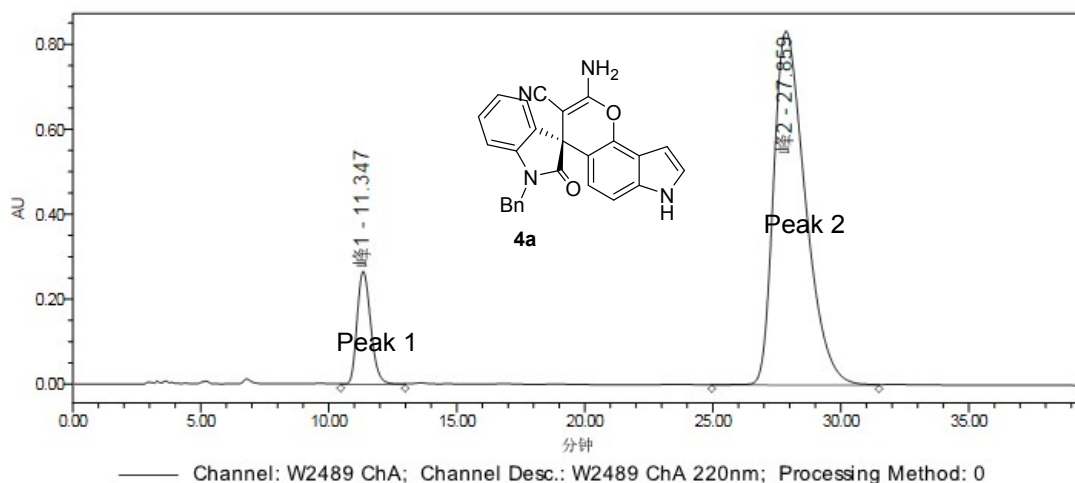

|   | Channel Description | Peak Name | RT (min) | Area (峰*sec)<br>μAU*sec | % Area | Height (峰)<br>μAU |
|---|---------------------|-----------|----------|-------------------------|--------|-------------------|
| 1 | W2489 ChA 220nm     | 峰1        | 11.347   | 9957721                 | 12.19  | 265882            |
| 2 | W2489 ChA 220nm     | 峰2        | 27.859   | 71745414                | 87.81  | 832427            |

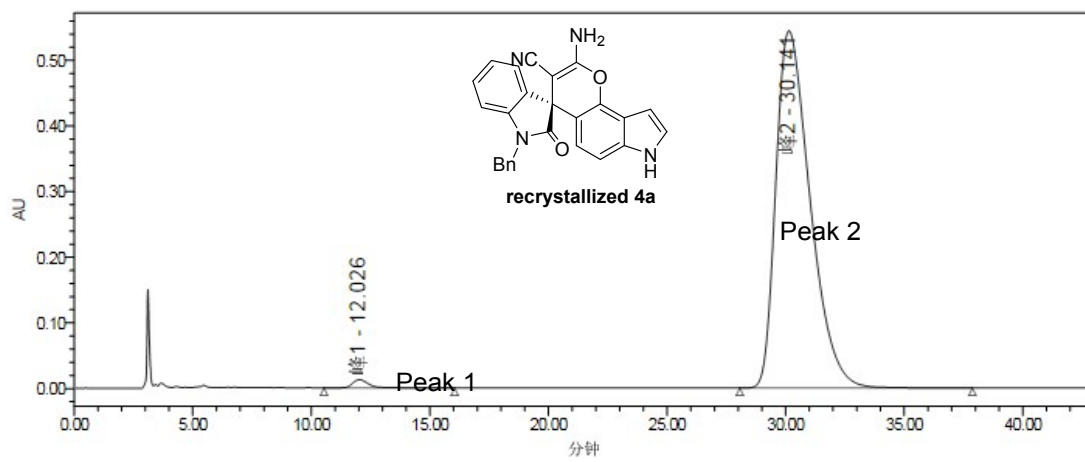

Channel: W2489 ChA; Channel Desc.: W2489 ChA 220nm; Processing Method: 0

|   | Channel Description | Peak Name    | RT (min) | Area (峰*sec)<br>μAU*sec | % Area | Height (峰)<br>μAU |
|---|---------------------|--------------|----------|-------------------------|--------|-------------------|
| 1 | W2489 ChA 220nm     | 峰1<br>Peak 1 | 12.026   | 576823                  | 1.05   | 12332             |
| 2 | W2489 ChA 220nm     | 峰2<br>Peak 2 | 30.141   | 54608278                | 98.95  | 544292            |

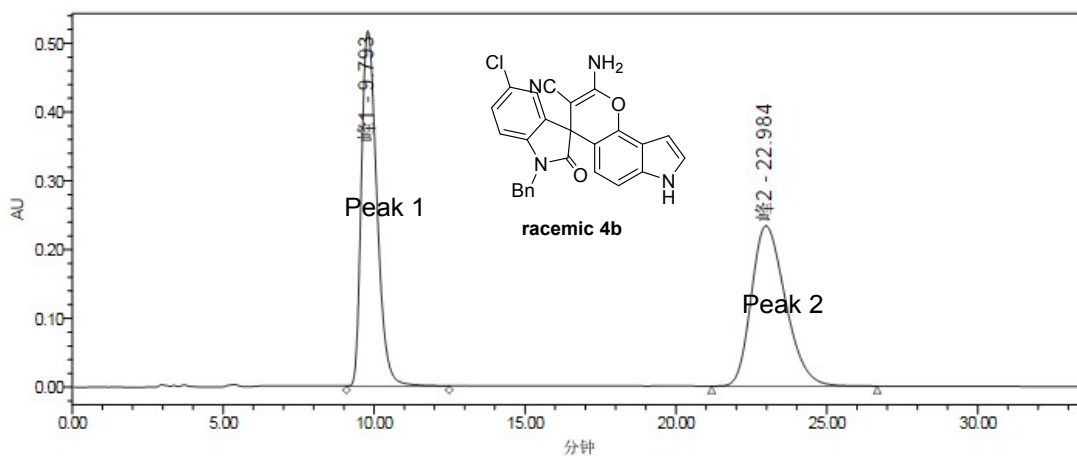

Channel: W2489 ChA; Channel Desc.: W2489 ChA 220nm; Processing Method: 0

|   | Channel Description | Peak Name    | RT (min) | Area (峰*sec)<br>μAU*sec | % Area | Height (峰)<br>μAU |
|---|---------------------|--------------|----------|-------------------------|--------|-------------------|
| 1 | W2489 ChA 220nm     | 峰1<br>Peak 1 | 9.793    | 18478837                | 50.18  | 516136            |
| 2 | W2489 ChA 220nm     | 峰2<br>Peak 2 | 22.984   | 18344202                | 49.82  | 233166            |

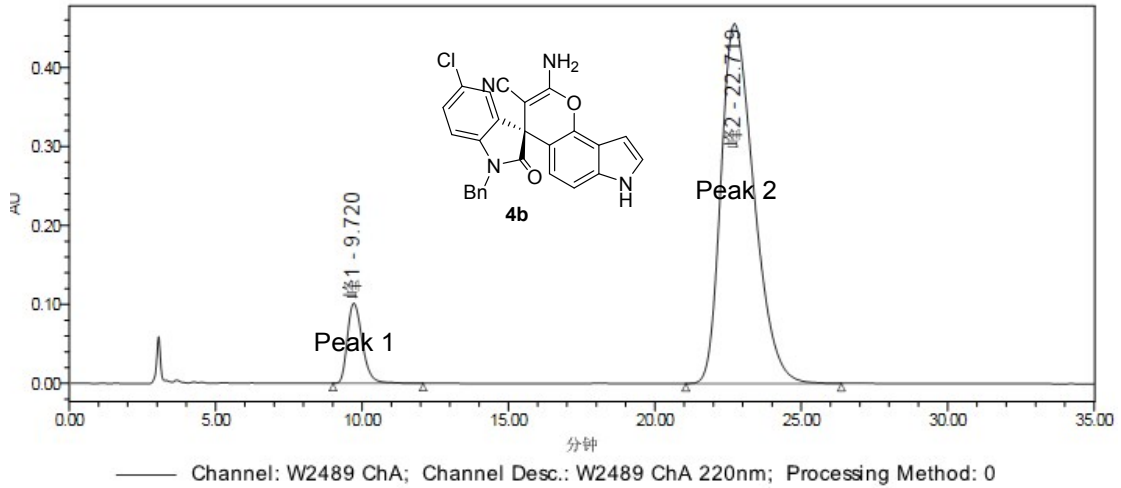

|   | Channel Description | Peak Name | RT (min) | Area (AU*sec) | % Area | Height (AU) |
|---|---------------------|-----------|----------|---------------|--------|-------------|
| 1 | W2489 ChA 220nm     | 峰1        | 9.720    | 3583658       | 9.15   | 101132      |
| 2 | W2489 ChA 220nm     | 峰2        | 22.719   | 35577433      | 90.85  | 455199      |

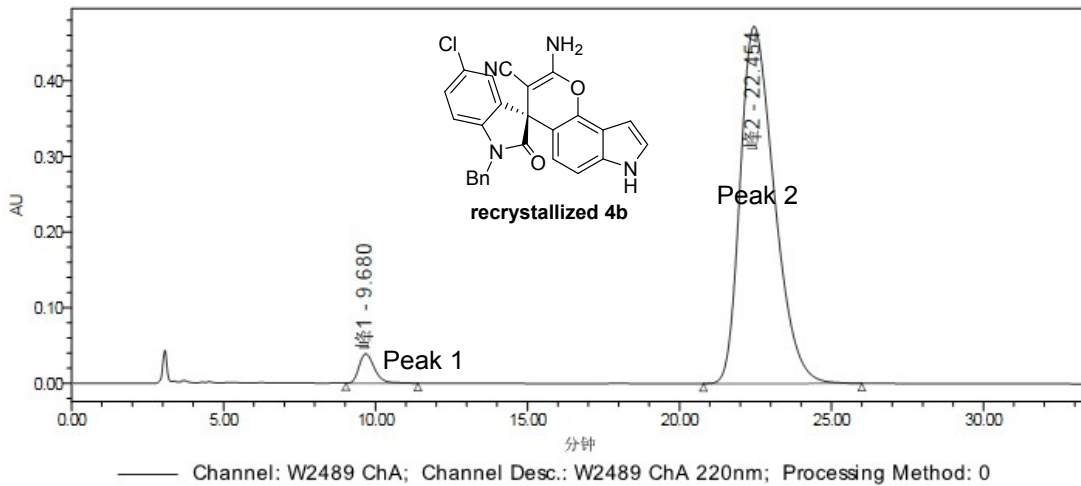

|   | Channel Description | Peak Name | RT (min) | Area (AU*sec) | % Area | Height (AU) |
|---|---------------------|-----------|----------|---------------|--------|-------------|
| 1 | W2489 ChA 220nm     | 峰1        | 9.680    | 1359386       | 3.57   | 38585       |
| 2 | W2489 ChA 220nm     | 峰2        | 22.454   | 36740237      | 96.43  | 472150      |

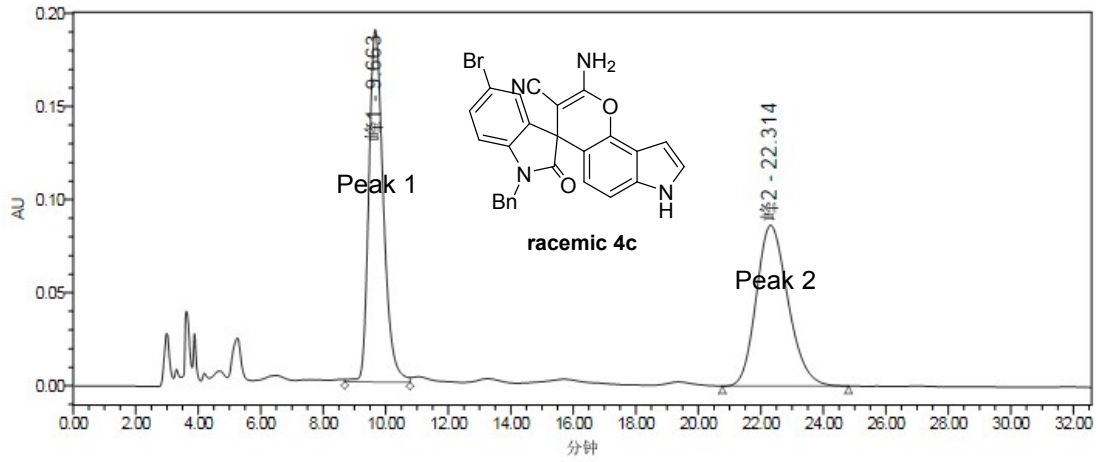

|   | Channel Description | Peak Name    | RT (min) | Area (AU*sec) | % Area | Height (AU) |
|---|---------------------|--------------|----------|---------------|--------|-------------|
| 1 | W2489 ChA 220nm     | 峰1<br>Peak 1 | 9.663    | 6126328       | 50.17  | 189015      |
| 2 | W2489 ChA 220nm     | 峰2<br>Peak 2 | 22.314   | 6085694       | 49.83  | 86325       |

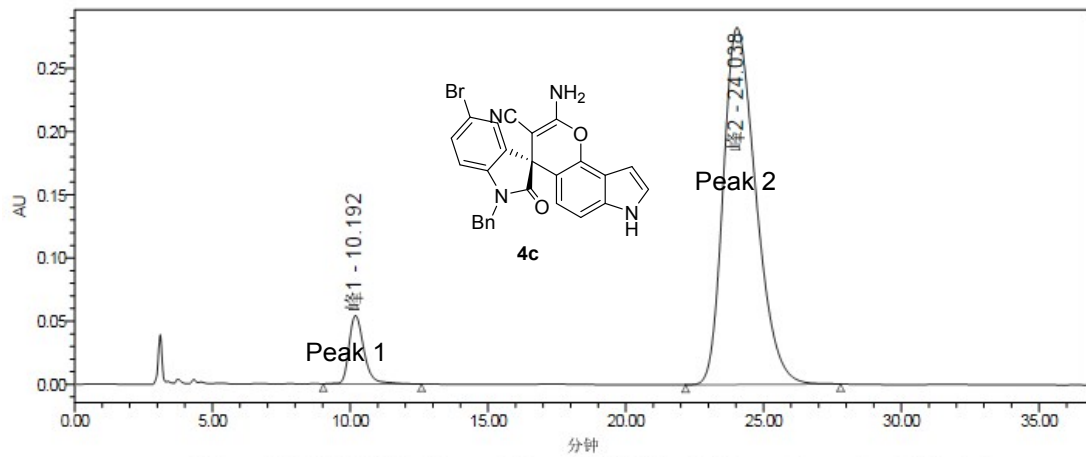

|   | Channel Description | Peak Name    | RT (min) | Area (AU*sec) | % Area | Height (AU) |
|---|---------------------|--------------|----------|---------------|--------|-------------|
| 1 | W2489 ChA 220nm     | 峰1<br>Peak 1 | 10.192   | 2051513       | 8.09   | 54071       |
| 2 | W2489 ChA 220nm     | 峰2<br>Peak 2 | 24.038   | 23311115      | 91.91  | 282515      |

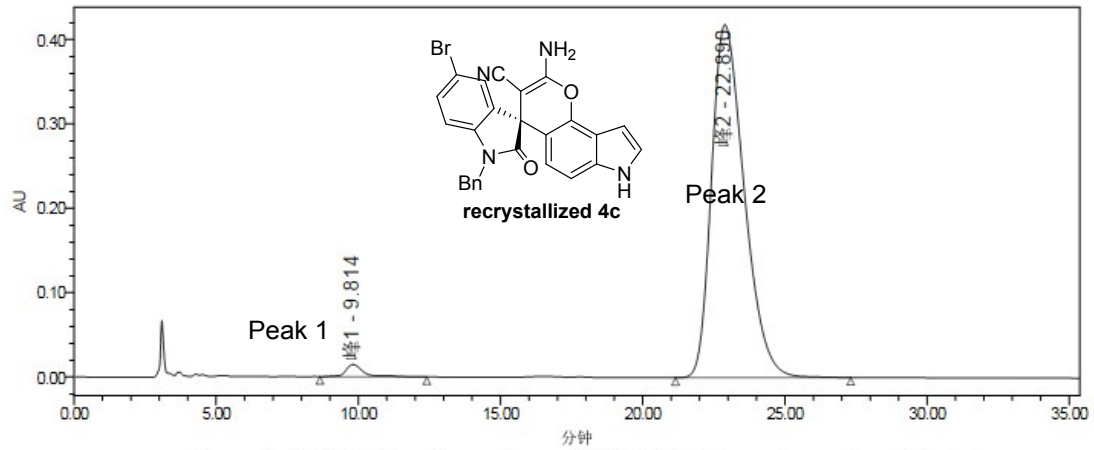

|   | Channel Description | Peak Name    | RT (min) | Area (AU*sec) | % Area | Height (AU) |
|---|---------------------|--------------|----------|---------------|--------|-------------|
| 1 | W2489 ChA 220nm     | Peak 1<br>峰1 | 9.814    | 652187        | 1.92   | 14548       |
| 2 | W2489 ChA 220nm     | Peak 2<br>峰2 | 22.890   | 33393600      | 98.08  | 418198      |

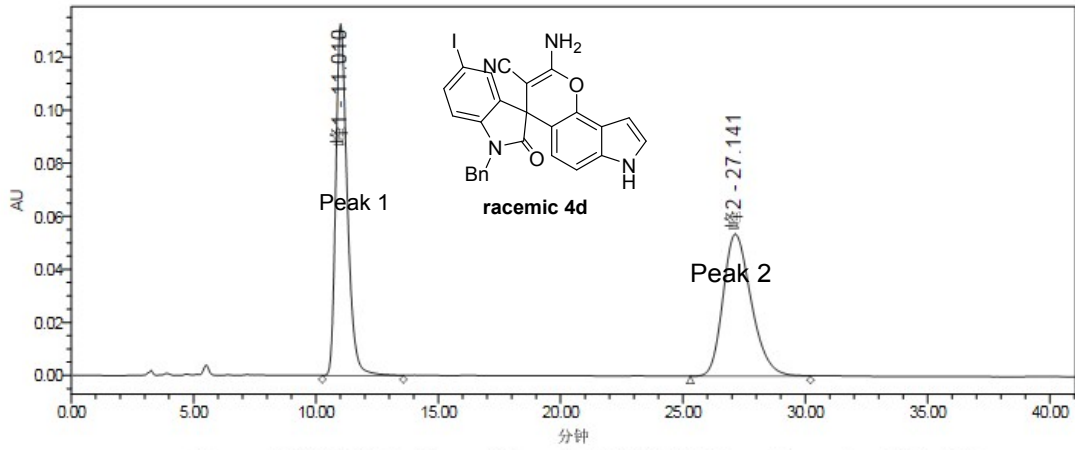

|   | Channel Description | Peak Name    | RT (min) | Area (AU*sec) | % Area | Height (AU) |
|---|---------------------|--------------|----------|---------------|--------|-------------|
| 1 | W2489 ChA 254nm     | Peak 1<br>峰1 | 11.010   | 4340804       | 50.19  | 152493      |
| 2 | W2489 ChA 254nm     | Peak 2<br>峰2 | 27.141   | 4307404       | 49.81  | 53543       |

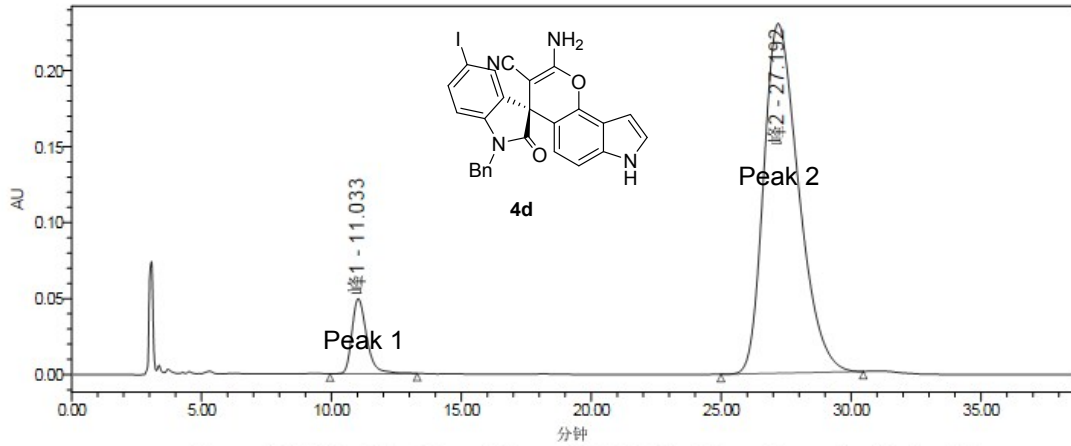

Channel: W2489 ChA; Channel Desc.: W2489 ChA 220nm; Processing Method: 0

|   | Channel Description | Peak Name | RT (min) | Area (AU*sec) | % Area | Height (AU) |
|---|---------------------|-----------|----------|---------------|--------|-------------|
| 1 | W2489 ChA 220nm     | 峰1        | 11.033   | 1951618       | 8.32   | 49388       |
| 2 | W2489 ChA 220nm     | 峰2        | 27.192   | 21500044      | 91.68  | 230111      |

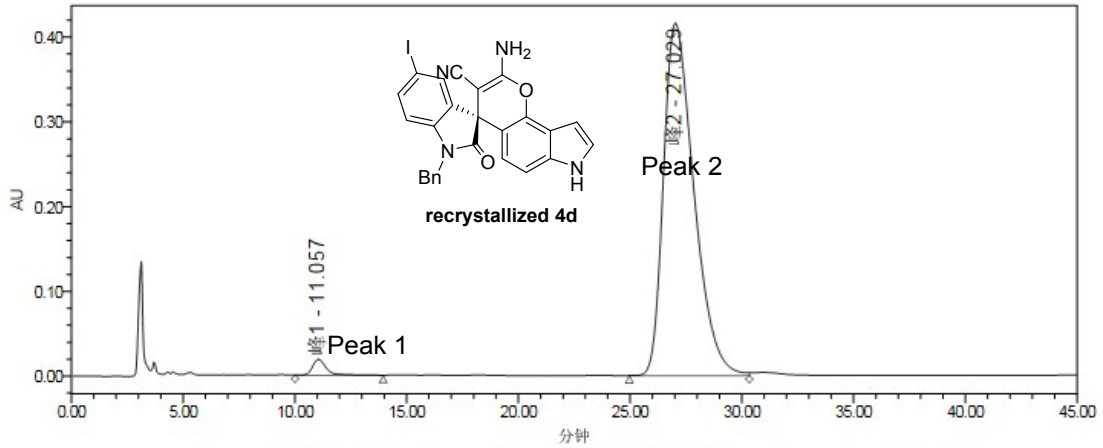

Channel: W2489 ChA; Channel Desc.: W2489 ChA 220nm; Processing Method: 0

|   | Channel Description | Peak Name | RT (min) | Area (AU*sec) | % Area | Height (AU) |
|---|---------------------|-----------|----------|---------------|--------|-------------|
| 1 | W2489 ChA 220nm     | 峰1        | 11.057   | 810928        | 2.02   | 18676       |
| 2 | W2489 ChA 220nm     | 峰2        | 27.029   | 39274983      | 97.98  | 415462      |

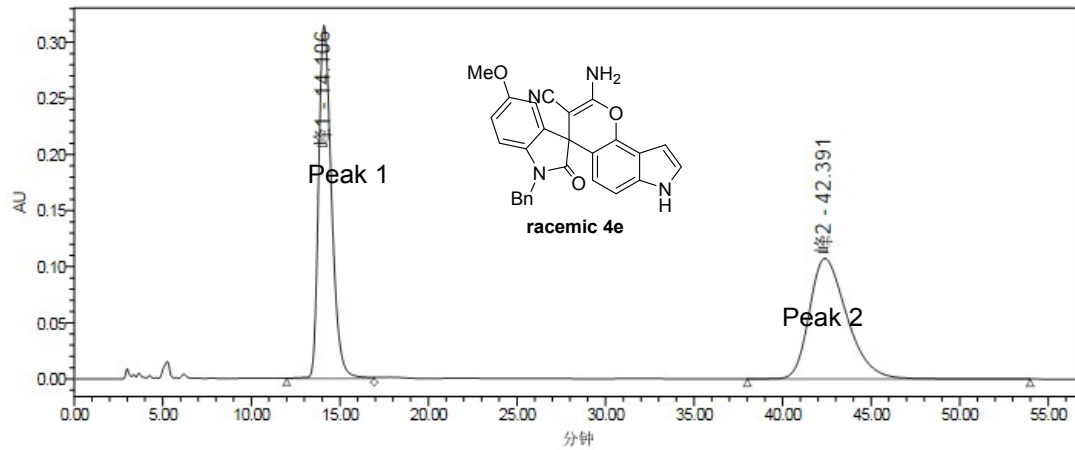

|   | Channel Description | Peak Name | RT (min) | Area (AU*sec) | % Area | Height (AU) |
|---|---------------------|-----------|----------|---------------|--------|-------------|
| 1 | W2489 ChA 220nm     | 峰1        | 14.106   | 15917608      | 50.14  | 314378      |
| 2 | W2489 ChA 220nm     | 峰2        | 42.391   | 15829349      | 49.86  | 107328      |

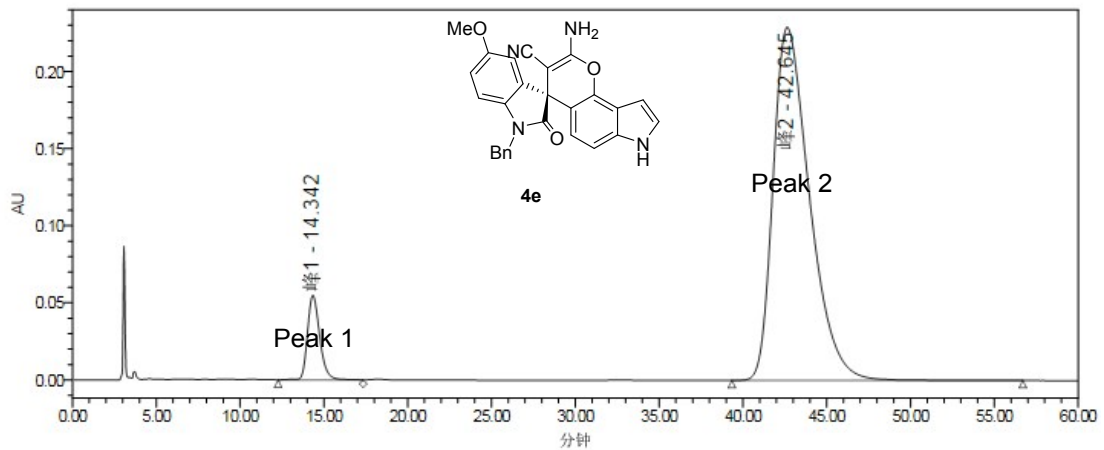

|   | Channel Description | Peak Name | RT (min) | Area (AU*sec) | % Area | Height (AU) |
|---|---------------------|-----------|----------|---------------|--------|-------------|
| 1 | W2489 ChA 220nm     | 峰1        | 14.342   | 2795431       | 7.48   | 54664       |
| 2 | W2489 ChA 220nm     | 峰2        | 42.645   | 34575557      | 92.52  | 228844      |



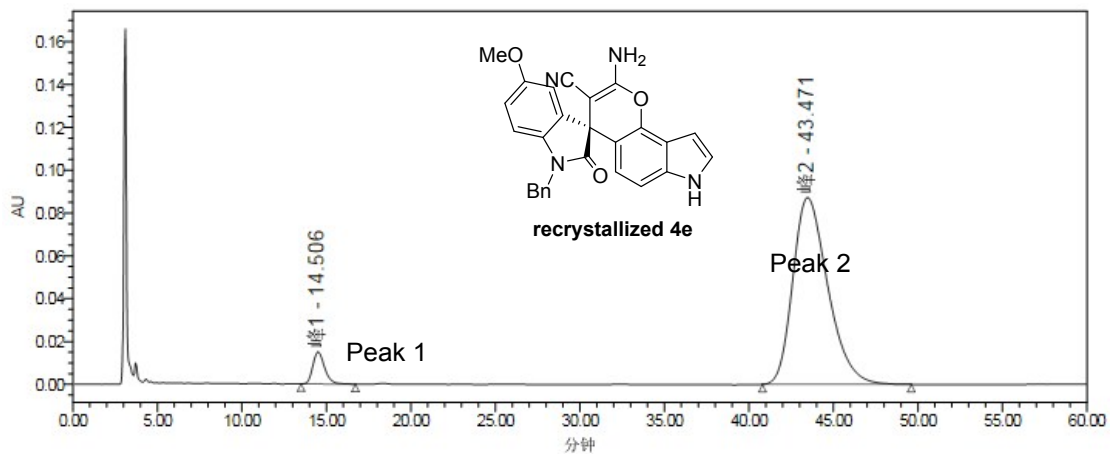

Channel: W2489 ChA; Channel Desc.: W2489 ChA 220nm; Processing Method: 0

|   | Channel Description | Peak Name    | RT (min) | Area (AU*sec) | % Area | Height (AU) |
|---|---------------------|--------------|----------|---------------|--------|-------------|
| 1 | W2489 ChA 220nm     | 峰1<br>Peak 1 | 14.506   | 725361        | 5.46   | 14876       |
| 2 | W2489 ChA 220nm     | 峰2<br>Peak 2 | 43.471   | 12565098      | 94.54  | 87215       |

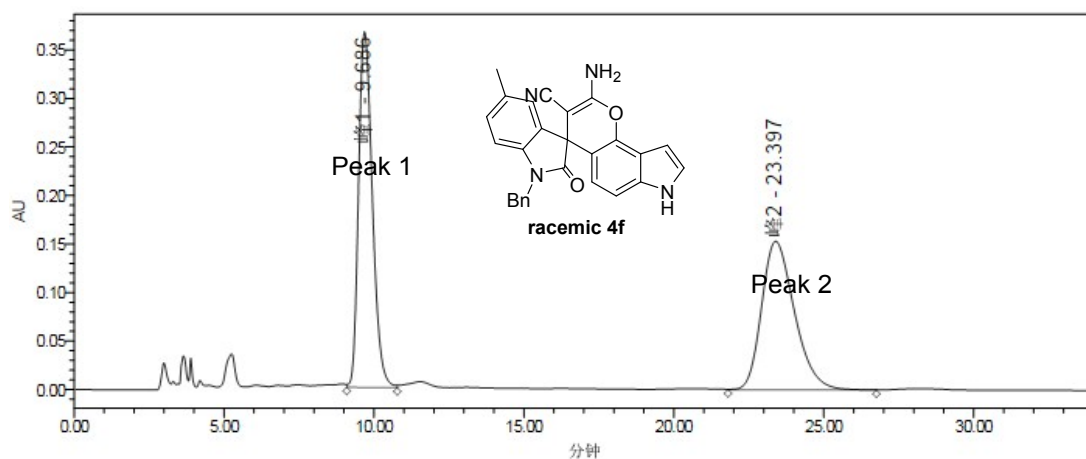

Channel: W2489 ChA; Channel Desc.: W2489 ChA 220nm; Processing Method: 0

|   | Channel Description | Peak Name    | RT (min) | Area (AU*sec) | % Area | Height (AU) |
|---|---------------------|--------------|----------|---------------|--------|-------------|
| 1 | W2489 ChA 220nm     | 峰1<br>Peak 1 | 9.686    | 11696124      | 50.06  | 366145      |
| 2 | W2489 ChA 220nm     | 峰2<br>Peak 2 | 23.397   | 11669585      | 49.94  | 153012      |



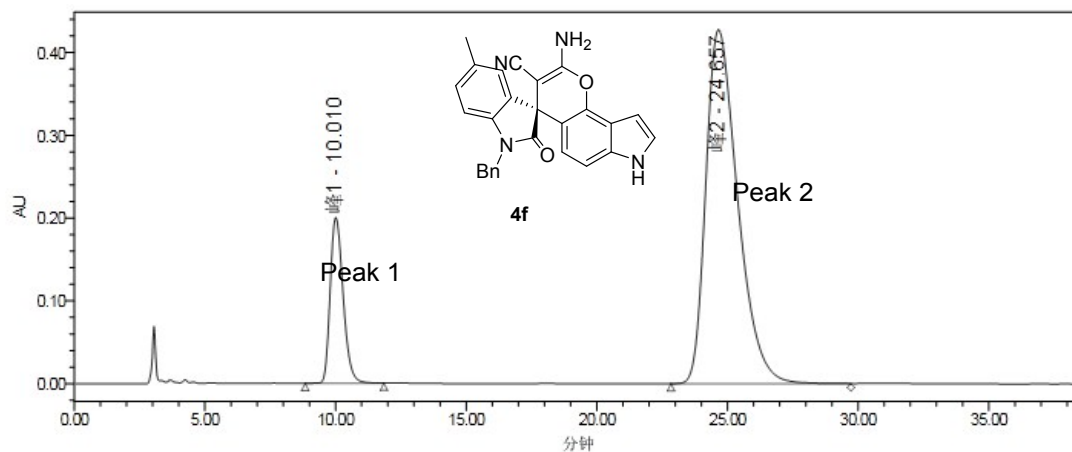

Channel: W2489 ChA; Channel Desc.: W2489 ChA 220nm; Processing Method: 0

|   | Channel Description | Peak Name | RT (min) | Area (AU*sec) | % Area | Height (AU) |
|---|---------------------|-----------|----------|---------------|--------|-------------|
| 1 | W2489 ChA 220nm     | 峰1        | 10.010   | 6889855       | 15.97  | 200132      |
| 2 | W2489 ChA 220nm     | 峰2        | 24.657   | 36249111      | 84.03  | 427578      |

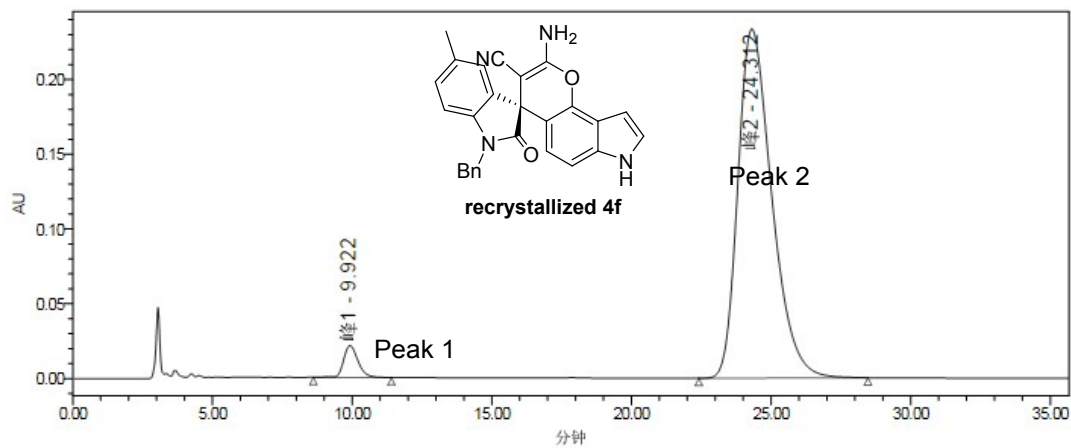

Channel: W2489 ChA; Channel Desc.: W2489 ChA 220nm; Processing Method: 0

|   | Channel Description | Peak Name | RT (min) | Area (AU*sec) | % Area | Height (AU) |
|---|---------------------|-----------|----------|---------------|--------|-------------|
| 1 | W2489 ChA 220nm     | 峰1        | 9.922    | 764028        | 3.74   | 21229       |
| 2 | W2489 ChA 220nm     | 峰2        | 24.312   | 19678438      | 96.26  | 233522      |

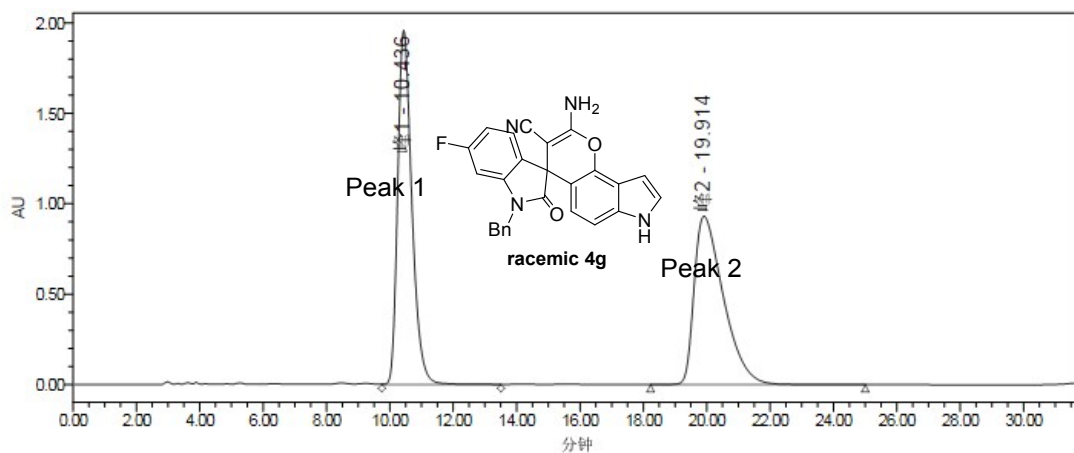

Channel: W2489 ChA; Channel Desc.: W2489 ChA 220nm; Processing Method: 0

|   | Channel Description | Peak Name    | RT (min) | Area (AU*sec) | % Area | Height (AU) |
|---|---------------------|--------------|----------|---------------|--------|-------------|
| 1 | W2489 ChA 220nm     | 峰1<br>Peak 1 | 10.436   | 60692336      | 50.44  | 1955652     |
| 2 | W2489 ChA 220nm     | 峰2<br>Peak 2 | 19.914   | 59633281      | 49.56  | 930828      |

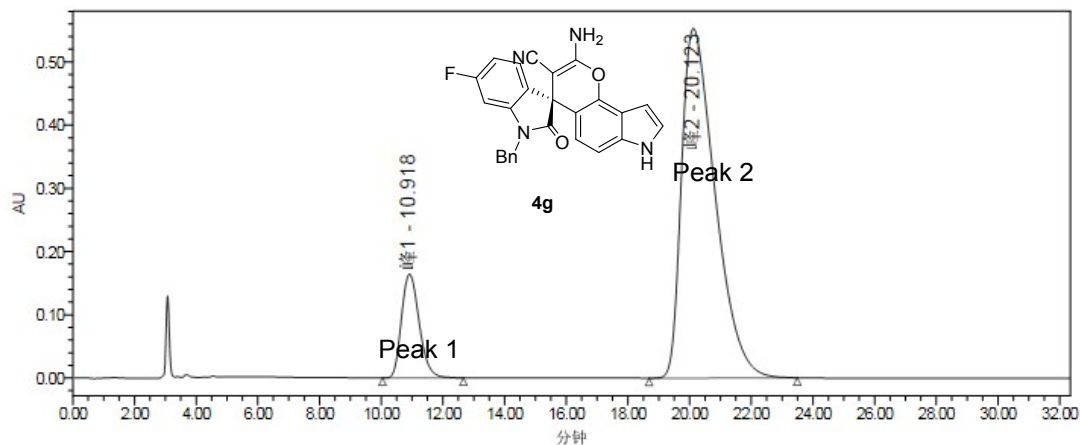

Channel: W2489 ChA; Channel Desc.: W2489 ChA 220nm; Processing Method: 0

|   | Channel Description | Peak Name    | RT (min) | Area (AU*sec) | % Area | Height (AU) |
|---|---------------------|--------------|----------|---------------|--------|-------------|
| 1 | W2489 ChA 220nm     | 峰1<br>Peak 1 | 10.918   | 6574227       | 13.61  | 163994      |
| 2 | W2489 ChA 220nm     | 峰2<br>Peak 2 | 20.123   | 41736494      | 86.39  | 552639      |

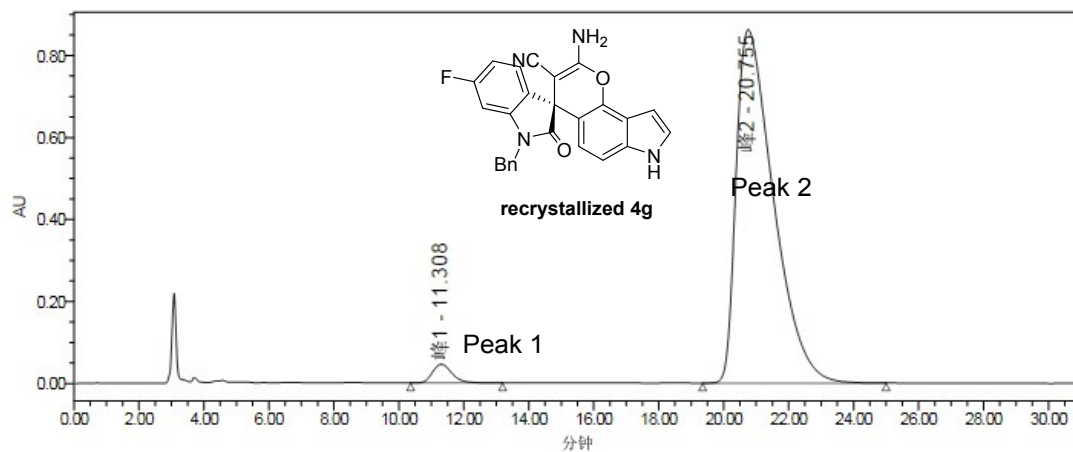

| Channel Description | Peak Name | RT (min) | Area (AU*sec) | % Area | Height (AU) |
|---------------------|-----------|----------|---------------|--------|-------------|
| W2489 ChA 220nm     | 峰1        | 11.308   | 1929778       | 2.73   | 45772       |
| W2489 ChA 220nm     | 峰2        | 20.755   | 68709938      | 97.27  | 862048      |

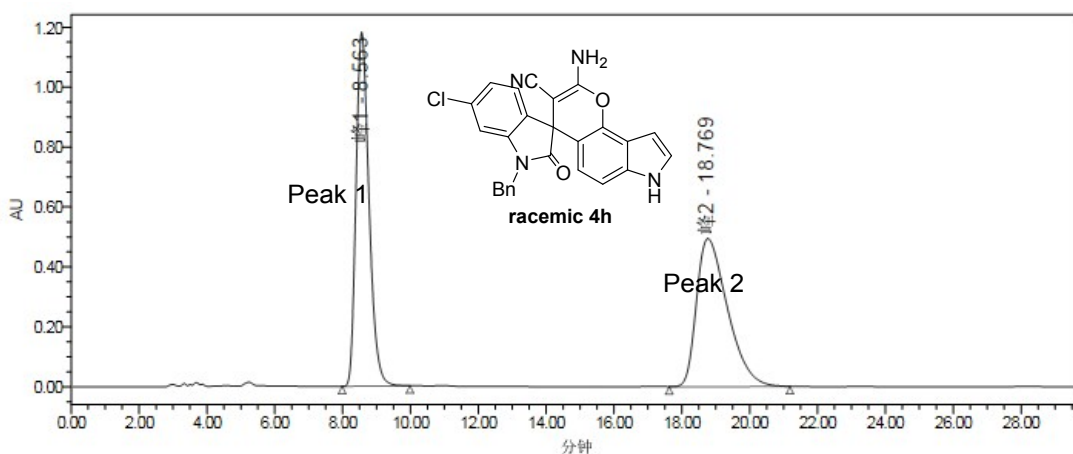

| Channel Description | Peak Name | RT (min) | Area (AU*sec) | % Area | Height (AU) |
|---------------------|-----------|----------|---------------|--------|-------------|
| W2489 ChA 220nm     | 峰1        | 8.563    | 31382041      | 50.05  | 1180366     |
| W2489 ChA 220nm     | 峰2        | 18.769   | 31323318      | 49.95  | 494057      |

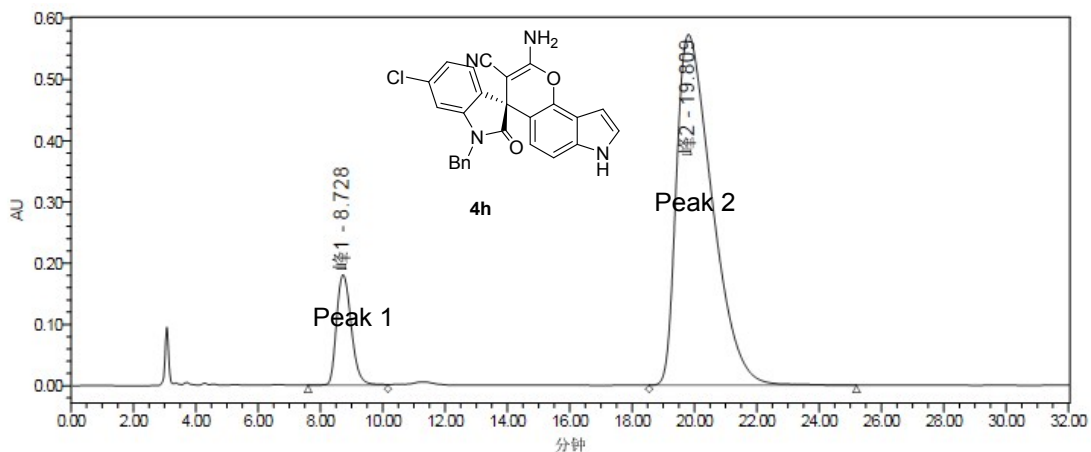

Channel: W2489 ChA; Channel Desc.: W2489 ChA 220nm; Processing Method: 0

|   | Channel Description | Peak Name | RT (min) | Area (AU*sec) | % Area | Height (AU) |
|---|---------------------|-----------|----------|---------------|--------|-------------|
| 1 | W2489 ChA 220nm     | 峰1        | 8.728    | 5933669       | 11.55  | 180057      |
| 2 | W2489 ChA 220nm     | 峰2        | 19.809   | 45446878      | 88.45  | 572719      |

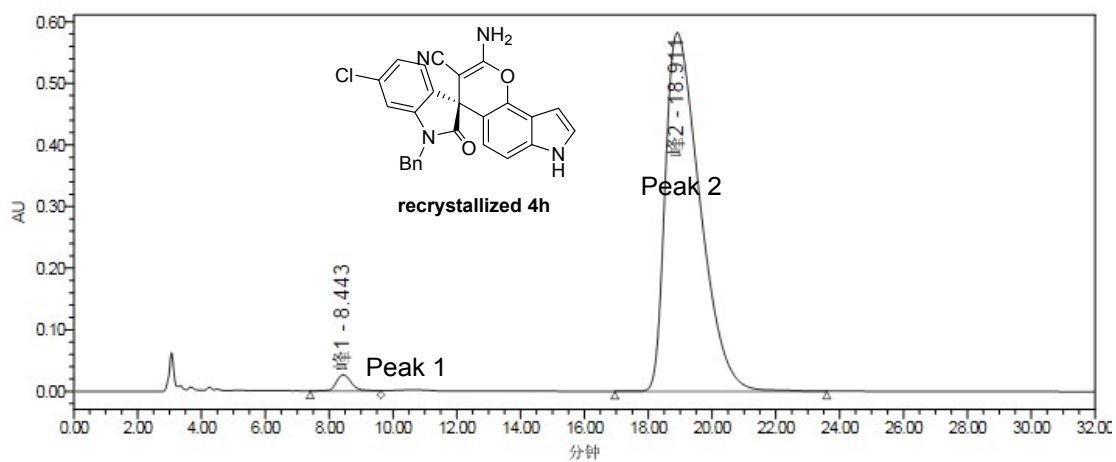

Channel: W2489 ChA; Channel Desc.: W2489 ChA 220nm; Processing Method: 0

|   | Channel Description | Peak Name | RT (min) | Area (AU*sec) | % Area | Height (AU) |
|---|---------------------|-----------|----------|---------------|--------|-------------|
| 1 | W2489 ChA 220nm     | 峰1        | 8.443    | 866818        | 1.94   | 26169       |
| 2 | W2489 ChA 220nm     | 峰2        | 18.911   | 43777057      | 98.06  | 581711      |

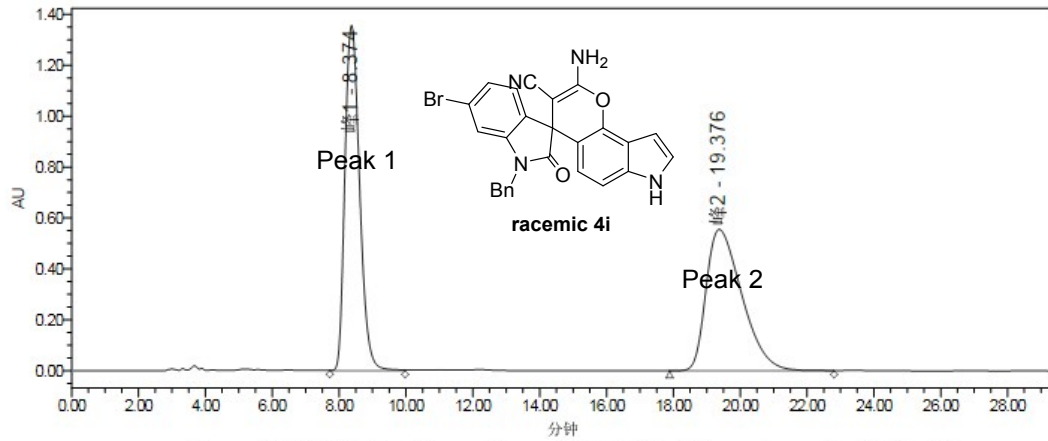

|   | Channel Description | Peak Name | RT (min) | Area (AU*sec) | % Area | Height (AU) |
|---|---------------------|-----------|----------|---------------|--------|-------------|
| 1 | W2489 ChA 220nm     | 峰1        | 8.374    | 41310707      | 49.97  | 1355712     |
| 2 | W2489 ChA 220nm     | 峰2        | 19.376   | 41365228      | 50.03  | 555616      |

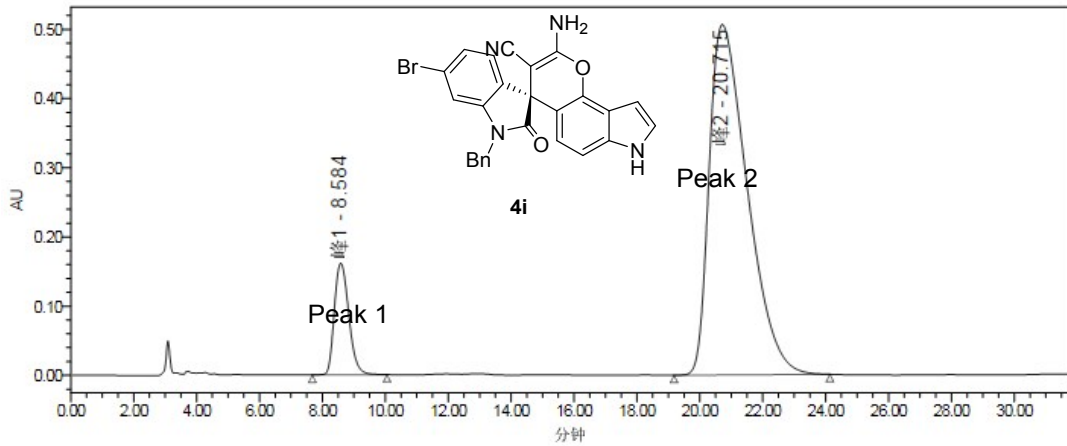

|   | Channel Description | Peak Name | RT (min) | Area (AU*sec) | % Area | Height (AU) |
|---|---------------------|-----------|----------|---------------|--------|-------------|
| 1 | W2489 ChA 220nm     | 峰1        | 8.584    | 5159676       | 10.83  | 161125      |
| 2 | W2489 ChA 220nm     | 峰2        | 20.715   | 42485909      | 89.17  | 506283      |

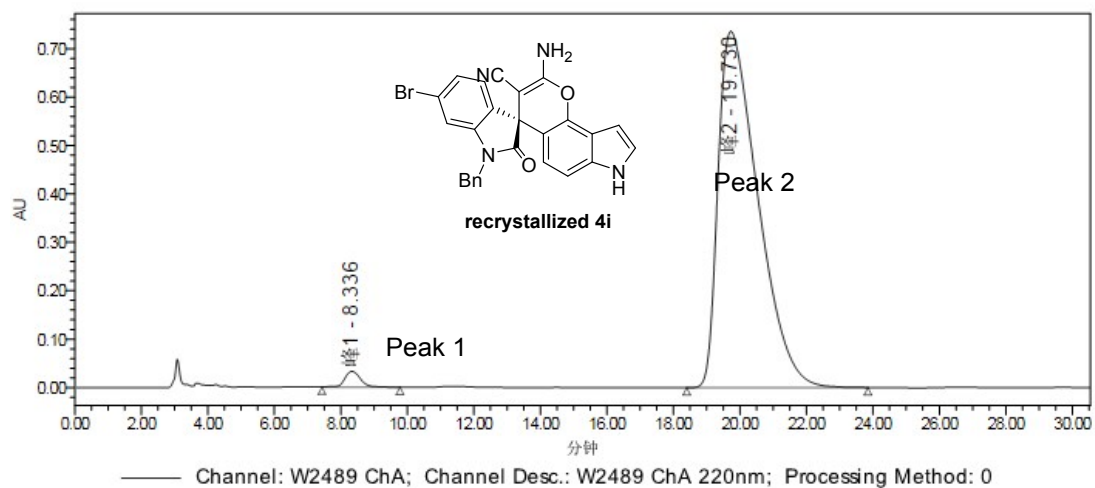

|   | Channel Description | Peak Name    | RT (min) | Area (峰*sec)<br>μAU*sec | % Area | Height (峰)<br>μAU |
|---|---------------------|--------------|----------|-------------------------|--------|-------------------|
| 1 | W2489 ChA 220nm     | 峰1<br>Peak 1 | 8.336    | 1034444                 | 1.66   | 32242             |
| 2 | W2489 ChA 220nm     | 峰2<br>Peak 2 | 19.730   | 61103511                | 98.34  | 735715            |

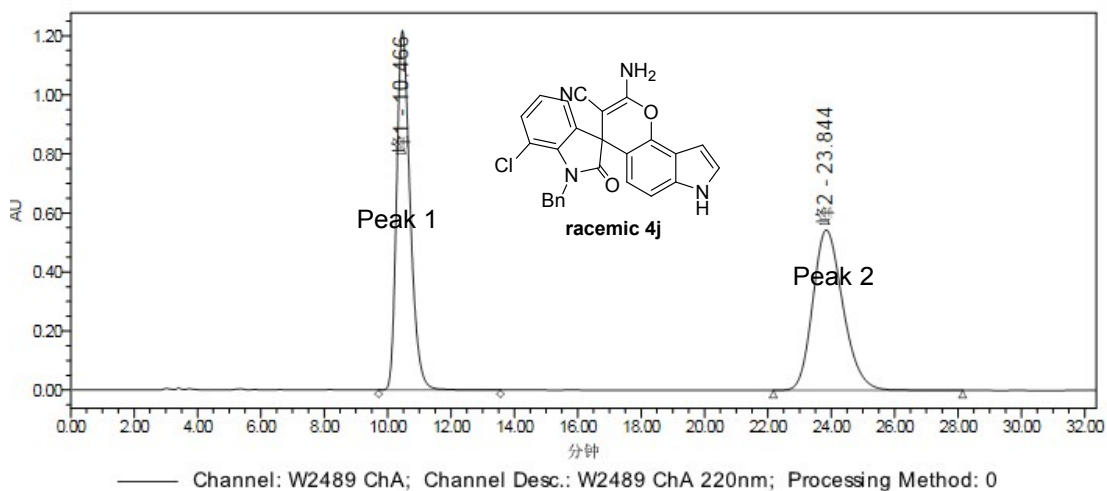

|   | Channel Description | Peak Name    | RT (min) | Area (峰*sec)<br>μAU*sec | % Area | Height (峰)<br>μAU |
|---|---------------------|--------------|----------|-------------------------|--------|-------------------|
| 1 | W2489 ChA 220nm     | 峰1<br>Peak 1 | 10.466   | 35992383                | 50.07  | 1216508           |
| 2 | W2489 ChA 220nm     | 峰2<br>Peak 2 | 23.844   | 35888964                | 49.93  | 543191            |



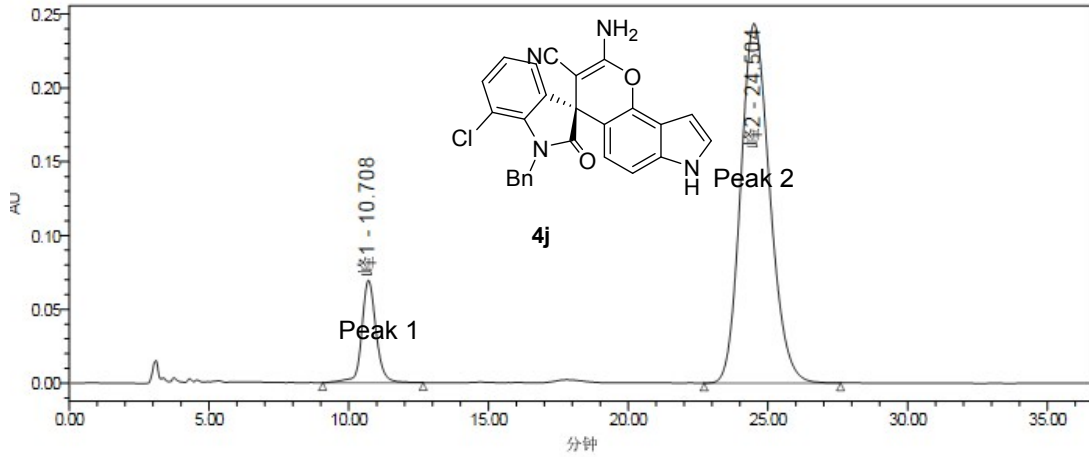

|   | Channel Description | Peak Name | RT (min) | Area (AU*sec) | % Area | Height (AU) |
|---|---------------------|-----------|----------|---------------|--------|-------------|
| 1 | W2489 ChA 220nm     | 峰1        | 10.708   | 2463889       | 12.28  | 69238       |
| 2 | W2489 ChA 220nm     | 峰2        | 24.504   | 17596030      | 87.72  | 243414      |

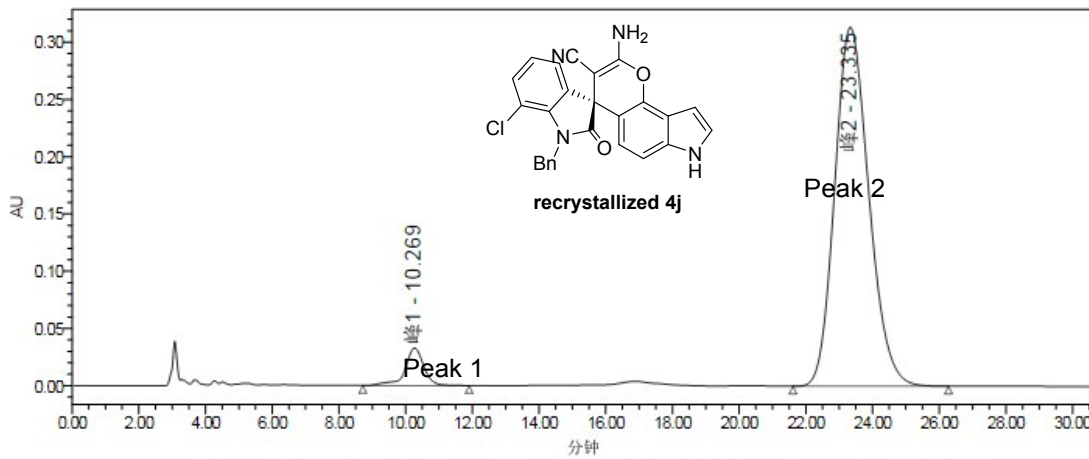

|   | Channel Description | Peak Name | RT (min) | Area (AU*sec) | % Area | Height (AU) |
|---|---------------------|-----------|----------|---------------|--------|-------------|
| 1 | W2489 ChA 220nm     | 峰1        | 10.269   | 1292696       | 5.48   | 32766       |
| 2 | W2489 ChA 220nm     | 峰2        | 23.335   | 22293677      | 94.52  | 313506      |

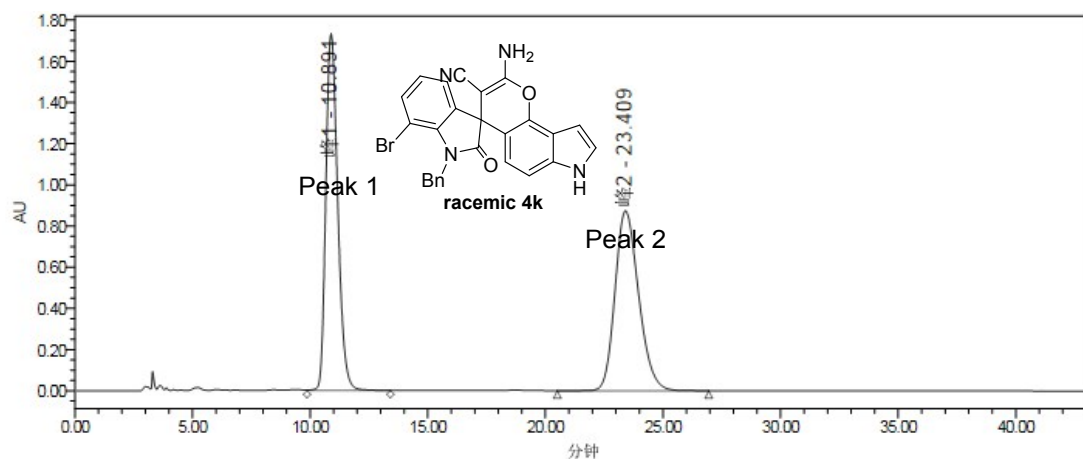

|   | Channel Description | Peak Name    | RT (min) | Area (AU*sec) | % Area | Height (AU) |
|---|---------------------|--------------|----------|---------------|--------|-------------|
| 1 | W2489 ChA 220nm     | 峰1<br>Peak 1 | 10.891   | 60698544      | 49.89  | 1731048     |
| 2 | W2489 ChA 220nm     | 峰2<br>Peak 2 | 23.409   | 60965581      | 50.11  | 872936      |

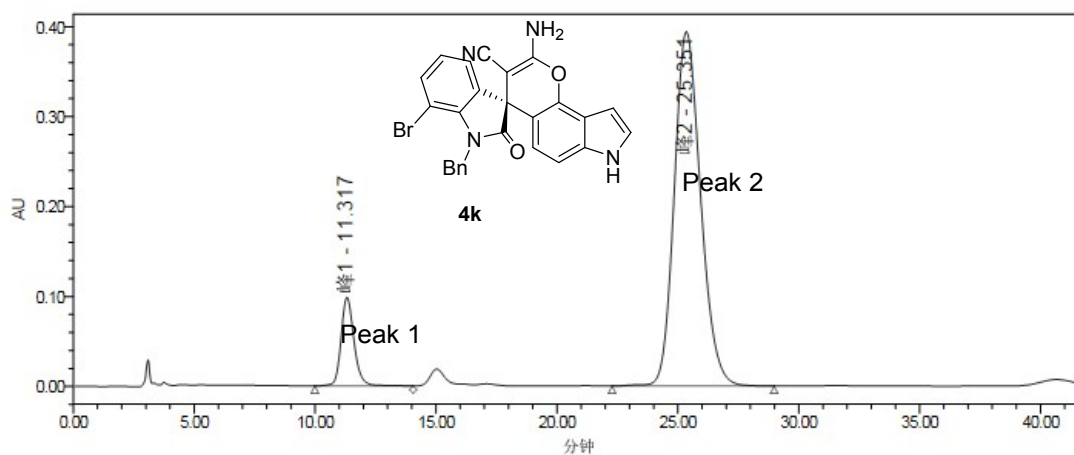

|   | Channel Description | Peak Name    | RT (min) | Area (AU*sec) | % Area | Height (AU) |
|---|---------------------|--------------|----------|---------------|--------|-------------|
| 1 | W2489 ChA 220nm     | 峰1<br>Peak 1 | 11.317   | 3675408       | 10.95  | 98327       |
| 2 | W2489 ChA 220nm     | 峰2<br>Peak 2 | 25.351   | 29887780      | 89.05  | 393712      |



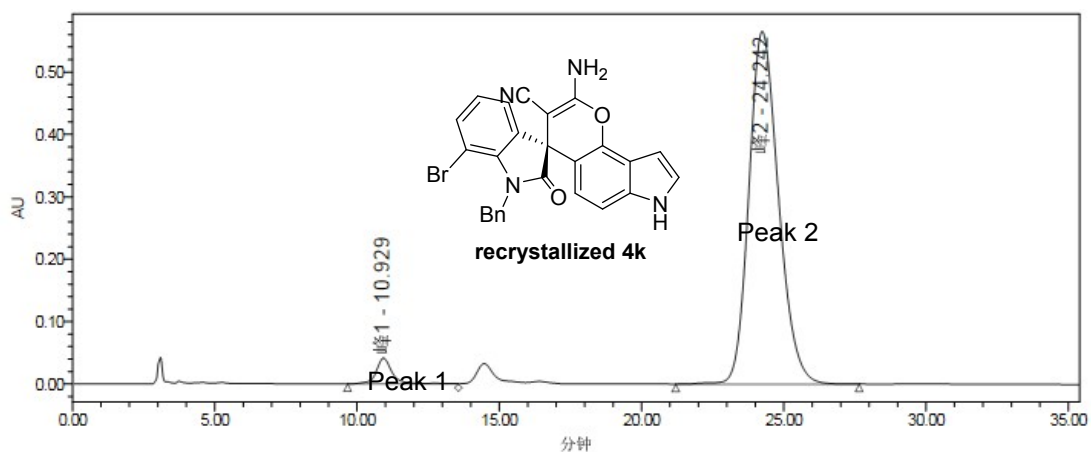

Channel: W2489 ChA; Channel Desc.: W2489 ChA 220nm; Processing Method: 0

|   | Channel Description | Peak Name | RT (min) | Area (AU*sec) | % Area | Height (AU) |
|---|---------------------|-----------|----------|---------------|--------|-------------|
| 1 | W2489 ChA 220nm     | 峰1        | 10.929   | 1619745       | 3.81   | 41212       |
| 2 | W2489 ChA 220nm     | 峰2        | 24.242   | 40938379      | 96.19  | 565095      |

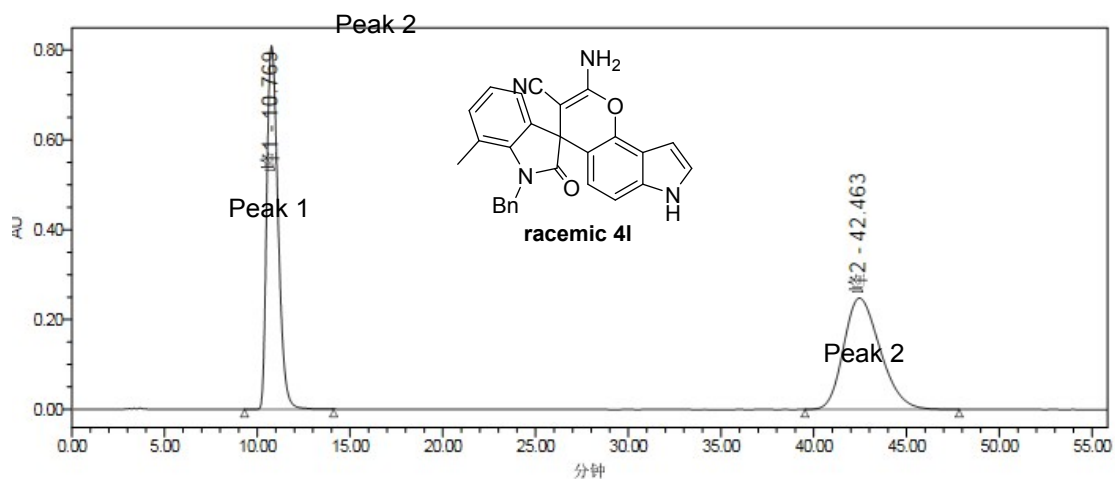

Channel: W2489 ChA; Channel Desc.: W2489 ChA 220nm; Processing Method: 0

|   | Channel Description | Peak Name | RT (min) | Area (AU*sec) | % Area | Height (AU) |
|---|---------------------|-----------|----------|---------------|--------|-------------|
| 1 | W2489 ChA 220nm     | 峰1        | 10.769   | 34065610      | 50.09  | 808705      |
| 2 | W2489 ChA 220nm     | 峰2        | 42.463   | 33945983      | 49.91  | 248045      |

Peak 2

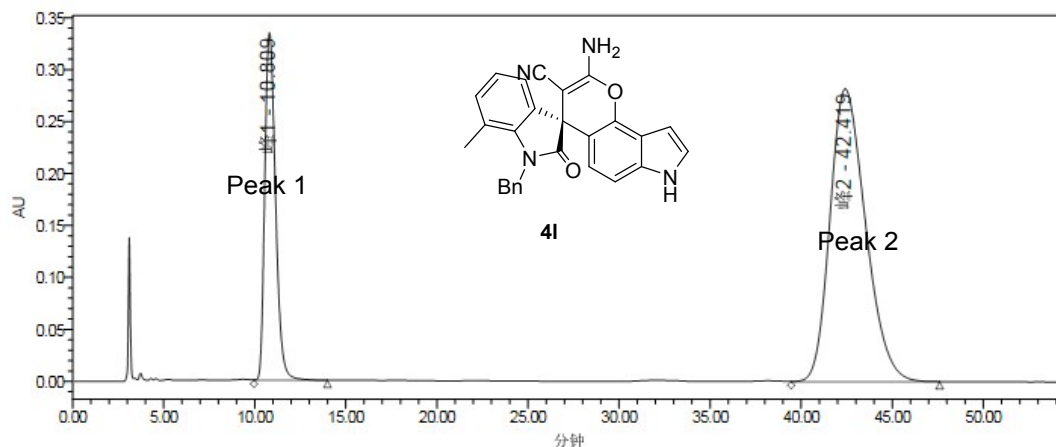

Channel: W2489 ChA; Channel Desc.: W2489 ChA 220nm; Processing Method: 0

|   | Channel Description | Peak Name | RT (min) | Area (AU*sec) | % Area | Height (AU) |
|---|---------------------|-----------|----------|---------------|--------|-------------|
| 1 | W2489 ChA 220nm     | 峰1        | 10.809   | 13638112      | 26.30  | 334116      |
| 2 | W2489 ChA 220nm     | 峰2        | 42.419   | 38211458      | 73.70  | 281553      |

Peak 2

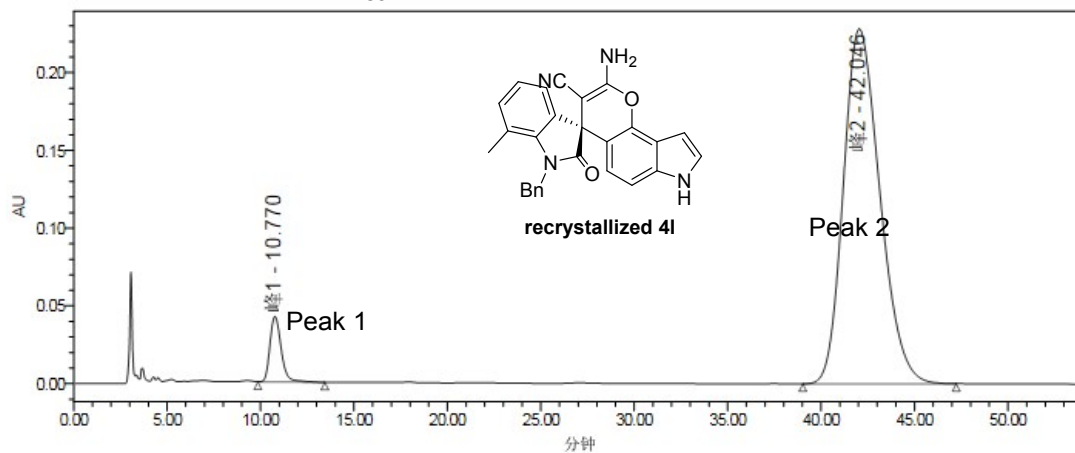

Channel: W2489 ChA; Channel Desc.: W2489 ChA 220nm; Processing Method: 0

|   | Channel Description | Peak Name | RT (min) | Area (AU*sec) | % Area | Height (AU) |
|---|---------------------|-----------|----------|---------------|--------|-------------|
| 1 | W2489 ChA 220nm     | 峰1        | 10.770   | 1762260       | 5.38   | 42018       |
| 2 | W2489 ChA 220nm     | 峰2        | 42.046   | 30983756      | 94.62  | 228163      |

Peak 2

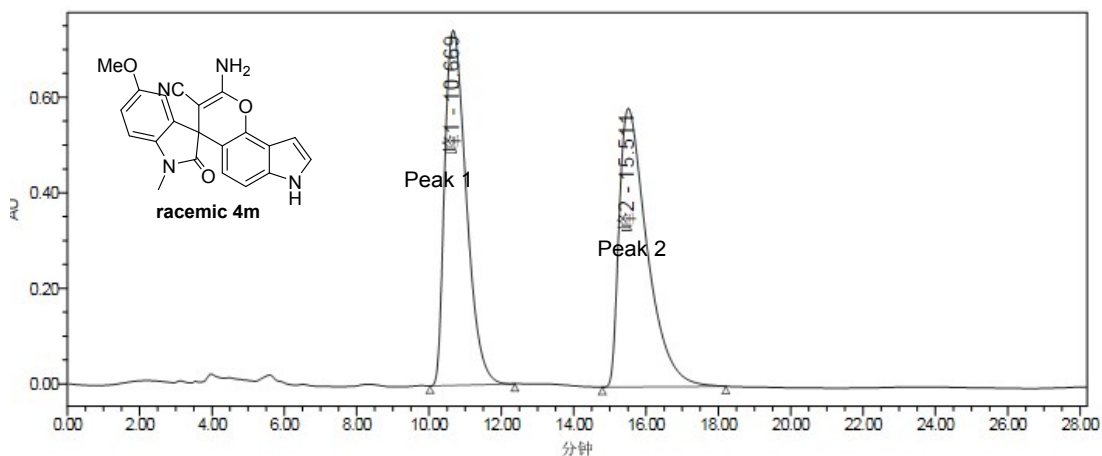

Channel: W2489 ChA; Channel Desc.: W2489 ChA 220nm; Processing Method: 0

|   | Channel Description | Peak Name    | RT (min) | Area (AU*sec) | % Area | Height (AU) |
|---|---------------------|--------------|----------|---------------|--------|-------------|
| 1 | W2489 ChA 220nm     | 峰1<br>Peak 1 | 10.669   | 30752686      | 49.57  | 743040      |
| 2 | W2489 ChA 220nm     | 峰2<br>Peak 2 | 15.511   | 31283288      | 50.43  | 583113      |

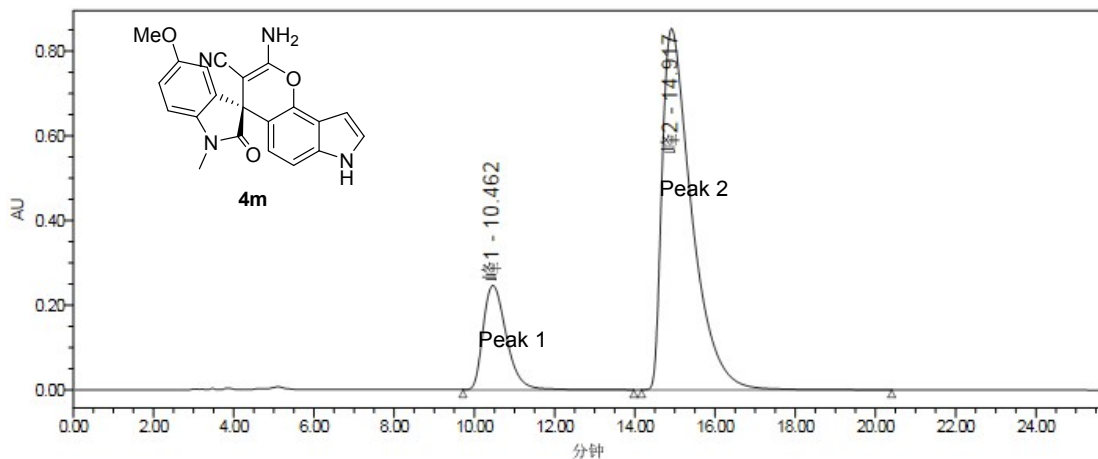

Channel: W2489 ChA; Channel Desc.: W2489 ChA 220nm; Processing Method: 0

|   | Channel Description | Peak Name    | RT (min) | Area (AU*sec) | % Area | Height (AU) |
|---|---------------------|--------------|----------|---------------|--------|-------------|
| 1 | W2489 ChA 220nm     | 峰1<br>Peak 1 | 10.462   | 9938274       | 18.55  | 246215      |
| 2 | W2489 ChA 220nm     | 峰2<br>Peak 2 | 14.917   | 43628303      | 81.45  | 853108      |

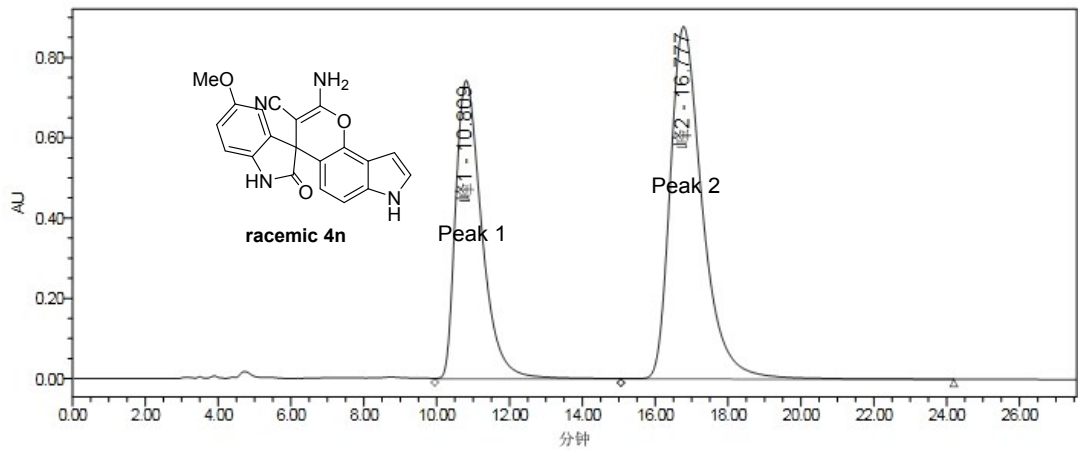

Channel: W2489 ChA; Channel Desc.: W2489 ChA 220nm; Processing Method: 0

|   | Channel Description | Peak Name    | RT (min) | Area (μAU*sec) | % Area | Height (μAU) |
|---|---------------------|--------------|----------|----------------|--------|--------------|
| 1 | W2489 ChA 220nm     | 峰1<br>Peak 1 | 10.809   | 37034587       | 40.75  | 743097       |
| 2 | W2489 ChA 220nm     | 峰2<br>Peak 2 | 16.777   | 53841100       | 59.25  | 877796       |

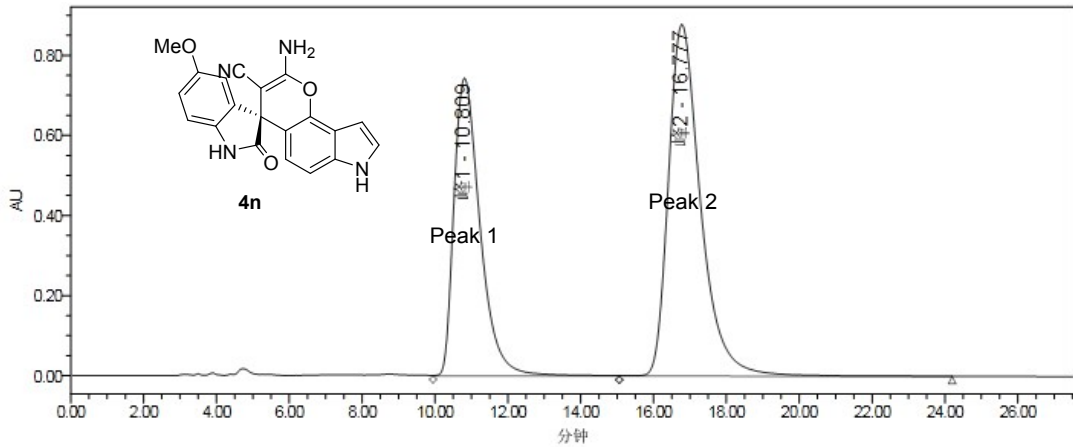

Channel: W2489 ChA; Channel Desc.: W2489 ChA 220nm; Processing Method: 0

|   | Channel Description | Peak Name    | RT (min) | Area (μAU*sec) | % Area | Height (μAU) |
|---|---------------------|--------------|----------|----------------|--------|--------------|
| 1 | W2489 ChA 220nm     | 峰1<br>Peak 1 | 10.809   | 37034587       | 40.75  | 743097       |
| 2 | W2489 ChA 220nm     | 峰2<br>Peak 2 | 16.777   | 53841100       | 59.25  | 877796       |

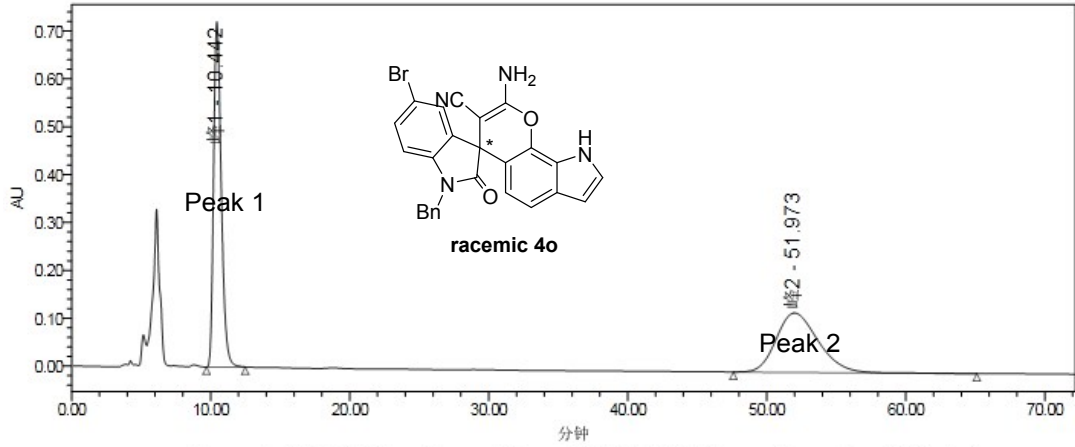

|   | Channel Description | Peak Name | RT (min) | Area (min*sec)<br>μAU*sec | % Area | Height<br>μAU |
|---|---------------------|-----------|----------|---------------------------|--------|---------------|
| 1 | W2489 ChA 220nm     | 峰1        | 10.442   | 27567183                  | 51.46  | 720471        |
| 2 | W2489 ChA 220nm     | 峰2        | 51.973   | 26003631                  | 48.54  | 124131        |

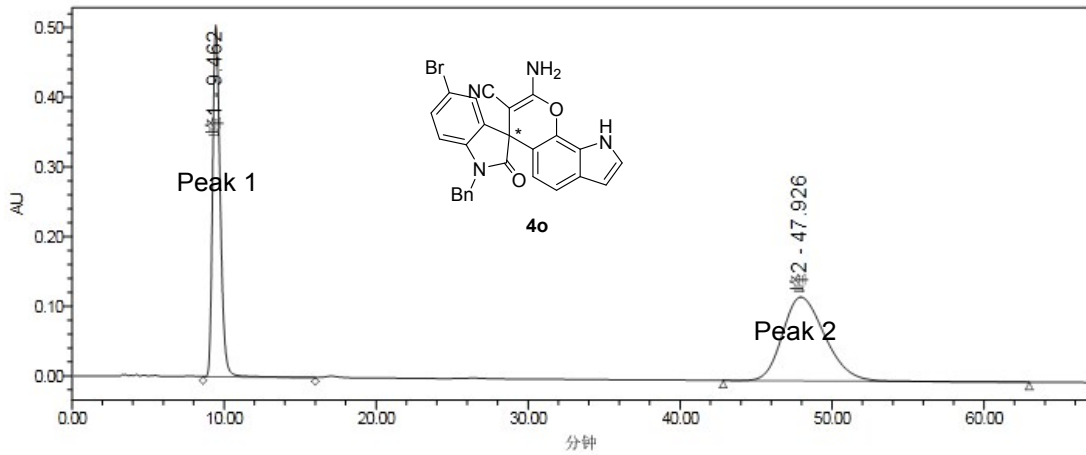

|   | Channel Description | Peak Name | RT (min) | Area (min*sec)<br>μAU*sec | % Area | Height<br>μAU |
|---|---------------------|-----------|----------|---------------------------|--------|---------------|
| 1 | W2489 ChA 220nm     | 峰1        | 9.462    | 17497019                  | 42.87  | 504288        |
| 2 | W2489 ChA 220nm     | 峰2        | 47.926   | 23321110                  | 57.13  | 120210        |

## 7. X-ray Crystallographic Data of compound 4e

**Table 1 Crystal data and structure refinement for 1.**

|                                             |                                                               |
|---------------------------------------------|---------------------------------------------------------------|
| Identification code                         | 1974647                                                       |
| Empirical formula                           | C <sub>27</sub> H <sub>20</sub> N <sub>4</sub> O <sub>3</sub> |
| Formula weight                              | 448.48                                                        |
| Temperature/K                               | 297.0                                                         |
| Crystal system                              | monoclinic                                                    |
| Space group                                 | P2 <sub>1</sub>                                               |
| a/Å                                         | 11.5749(3)                                                    |
| b/Å                                         | 8.9564(2)                                                     |
| c/Å                                         | 12.5886(4)                                                    |
| α /°                                        | 90.00                                                         |
| β /°                                        | 116.2140(10)                                                  |
| γ /°                                        | 90.00                                                         |
| Volume/Å <sup>3</sup>                       | 1170.83(5)                                                    |
| Z                                           | 23                                                            |
| ρ <sub>calc</sub> /cm <sup>3</sup>          | 1.272                                                         |
| μ /mm <sup>-1</sup>                         | 0.085                                                         |
| F(000)                                      | 468.0                                                         |
| Crystal size/mm <sup>3</sup>                | ? × ? × ?                                                     |
| Radiation                                   | MoK α ( λ = 0.71073)                                          |
| 2θ range for data collection/°              | 5.8 to 56.84                                                  |
| Index ranges                                | -15 ≤ h ≤ 15, -11 ≤ k ≤ 11, -16 ≤ l ≤ 16                      |
| Reflections collected                       | 29710                                                         |
| Independent reflections                     | 5819 [R <sub>int</sub> = 0.0512, R <sub>sigma</sub> = 0.0386] |
| Data/restraints/parameters                  | 5819/1/310                                                    |
| Goodness-of-fit on F <sup>2</sup>           | 1.022                                                         |
| Final R indexes [I>=2 σ (I)]                | R <sub>1</sub> = 0.0430, wR <sub>2</sub> = 0.0942             |
| Final R indexes [all data]                  | R <sub>1</sub> = 0.0766, wR <sub>2</sub> = 0.1147             |
| Largest diff. peak/hole / e Å <sup>-3</sup> | 0.17/-0.15                                                    |
| Flack parameter                             | 0.2(11)                                                       |

## 8. References

1. J. Li, N. Wang, C. Li and X. Jia, *Chem. - Eur. J.*, 2012, **18**, 9645-9650.
2. T.-Z. Li, J. Xie, Y. Jiang, F. Sha and X.-Y. Wu, *Adv. Synth. Catal.*, 2015, **357**, 3507-3511.
